# Supplementary material for: Multiregion ultra‐deep sequencing reveals early intermixing and variable levels of intratumoral heterogeneity in colorectal cancer
Source: PubMed Central journal article supplement (PMC5527459; doi:10.1002/1878-0261.12012), 2016-10-20

T\_T019A, LogR

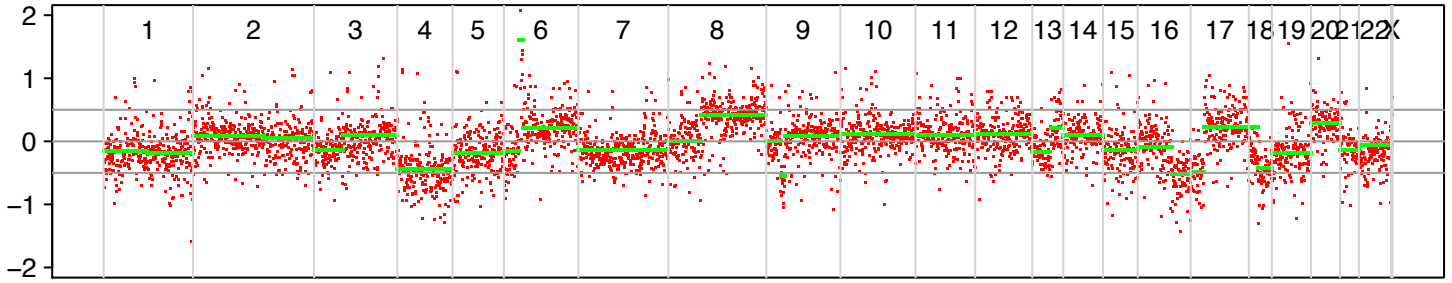

T\_T019A, BAF

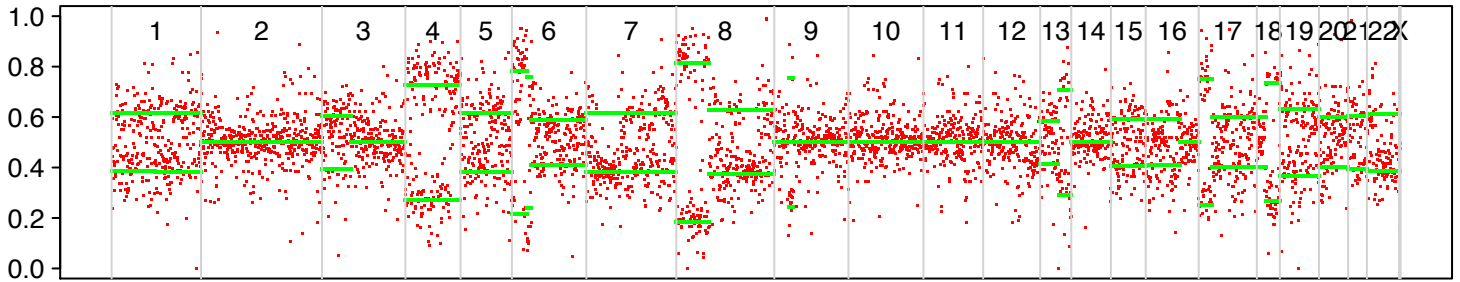

**Ploidy: 3.72, aberrant cell fraction: 49%, goodness of fit: 99.6%**

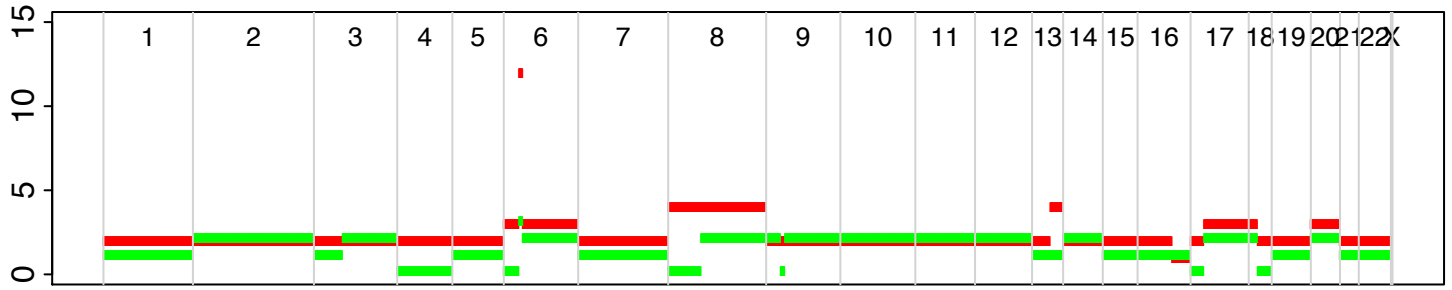

**Aberration reliability score (%), average: 81%**

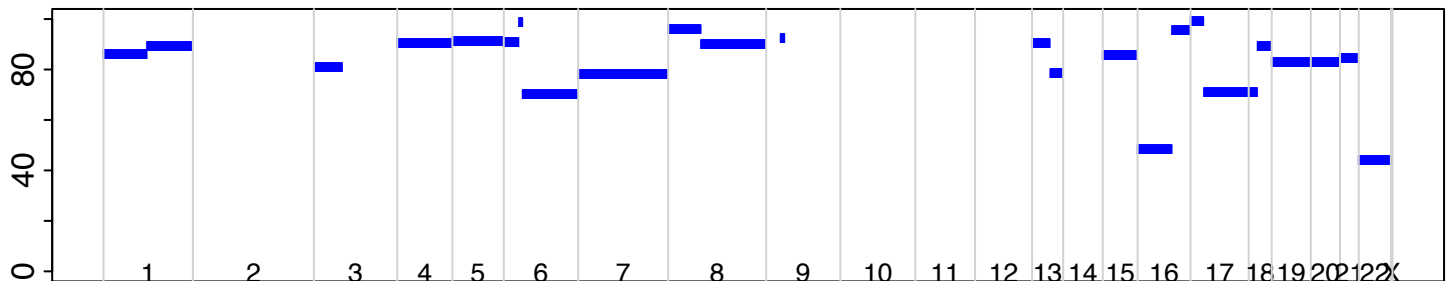

**Ploidy: 3.72, aberrant cell fraction: 49%, goodness of fit: 99.6%**

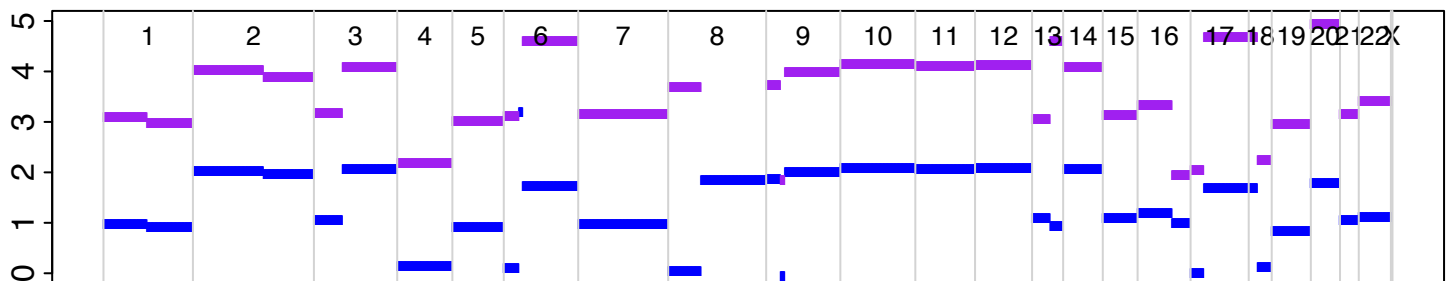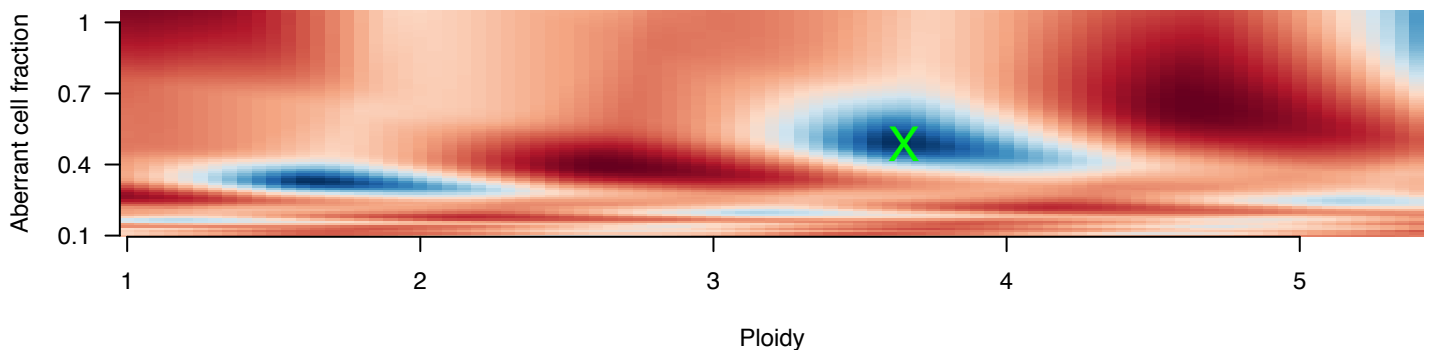

T\_T019B, LogR

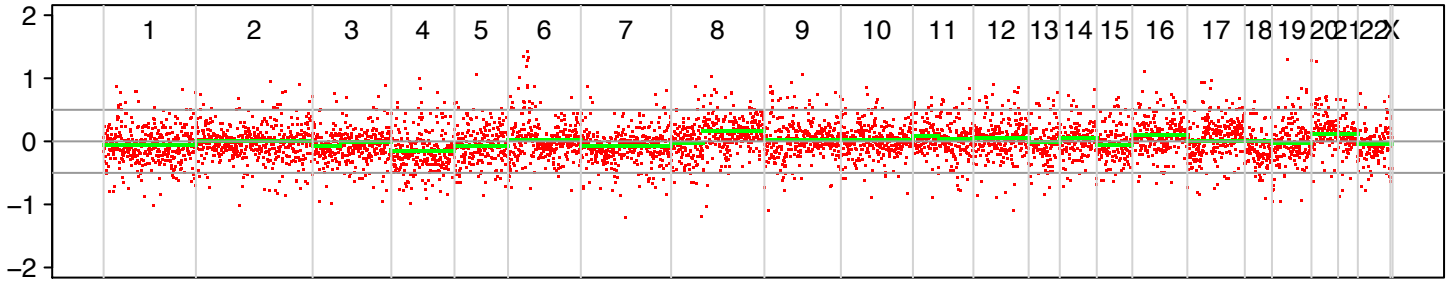

T\_T019B, BAF

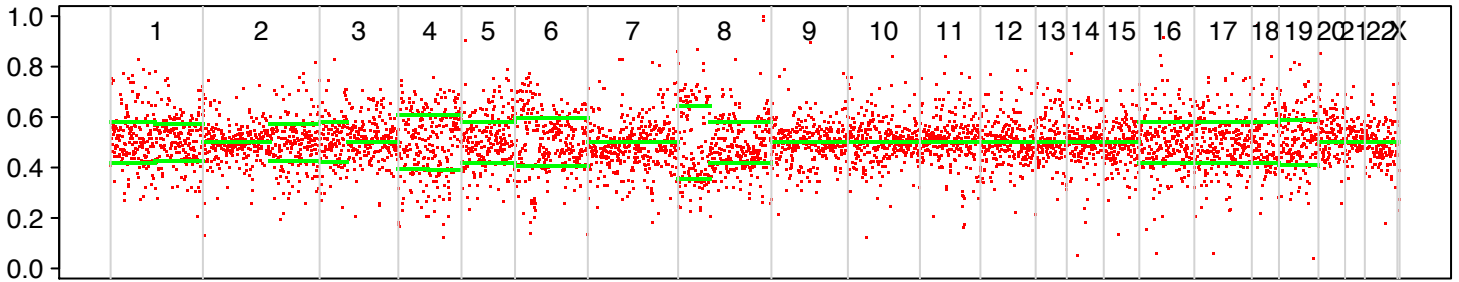

**Ploidy: 3.87, aberrant cell fraction: 24%, goodness of fit: 99.3%**

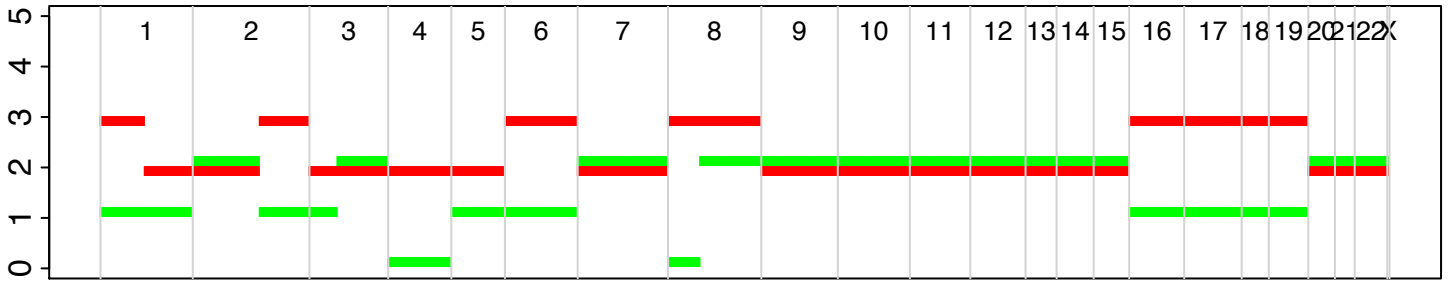

**Aberration reliability score (%), average: 77%**

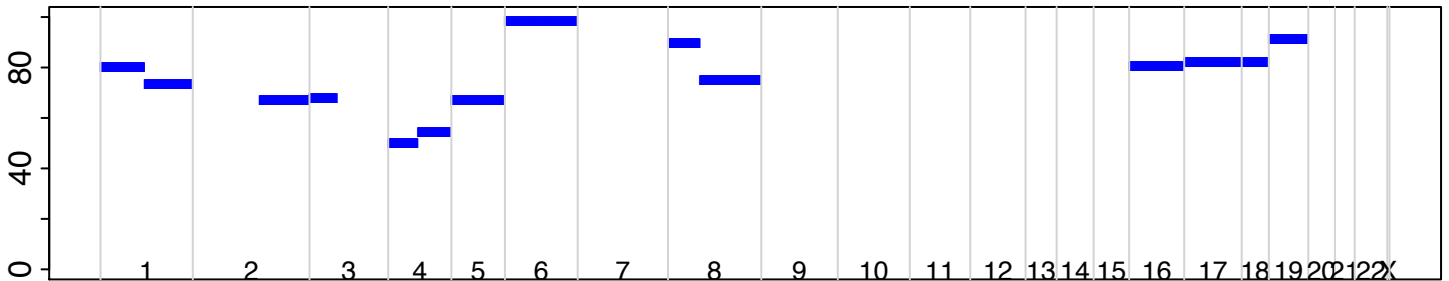

**Ploidy: 3.87, aberrant cell fraction: 24%, goodness of fit: 99.3%**

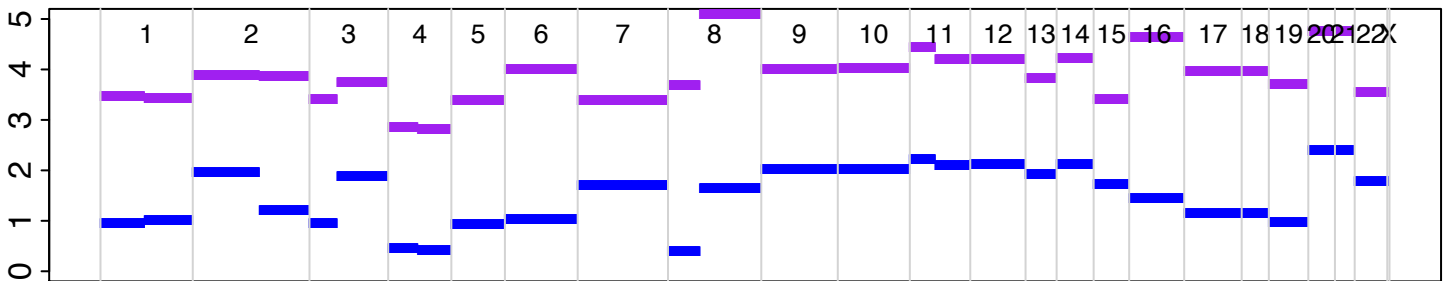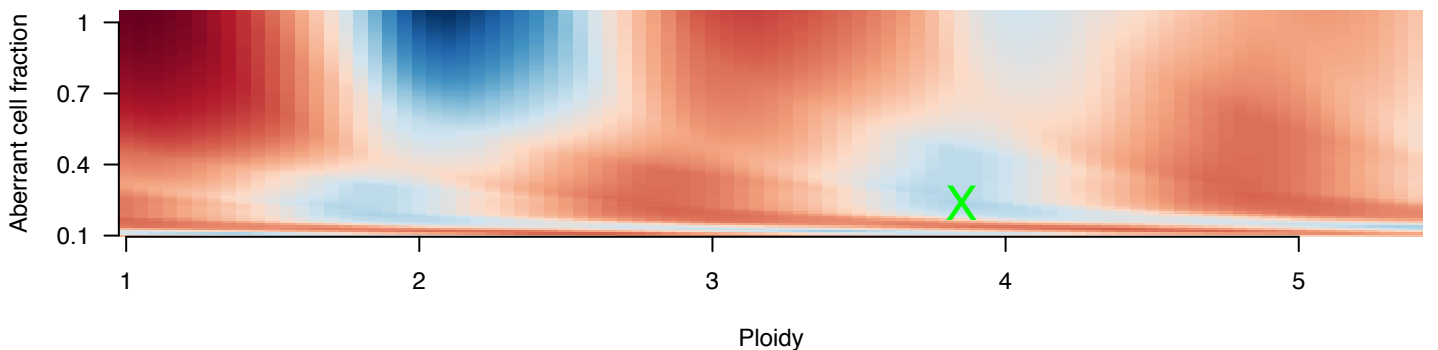

T\_T019C, LogR

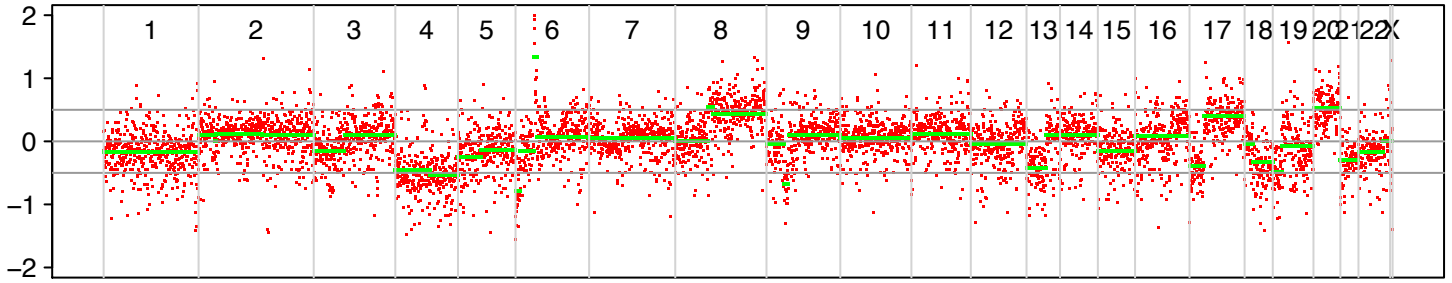

T\_T019C, BAF

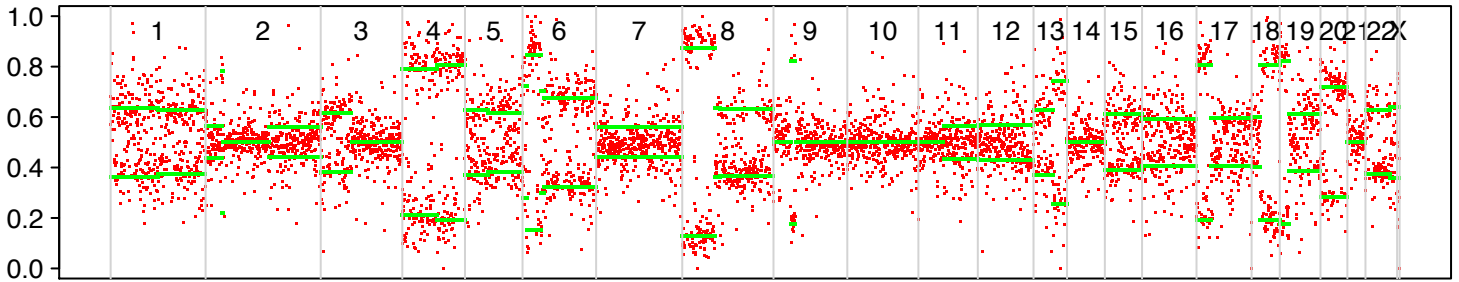

**Ploidy: 3.66, aberrant cell fraction: 59%, goodness of fit: 99.5%**

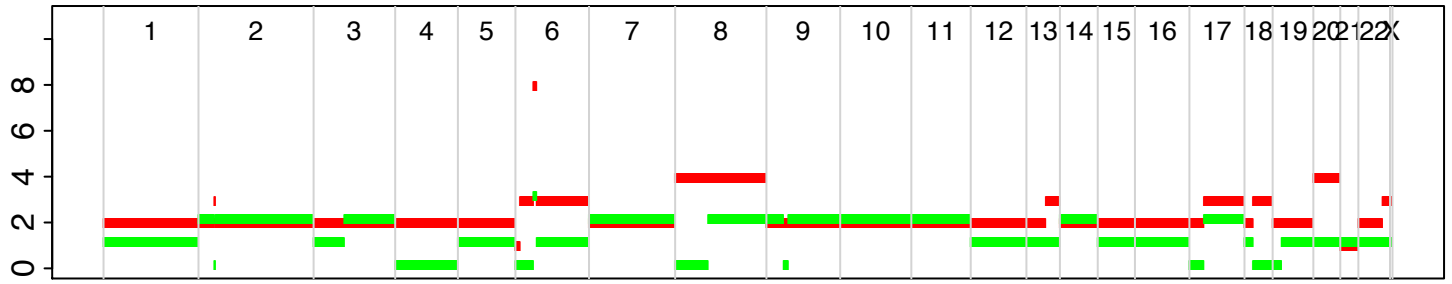

**Aberration reliability score (%), average: 75%**

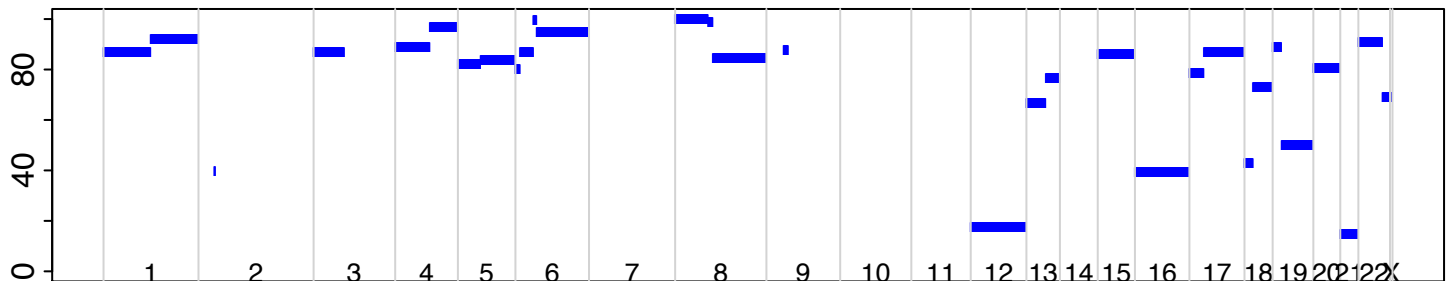

**Ploidy: 3.66, aberrant cell fraction: 59%, goodness of fit: 99.5%**

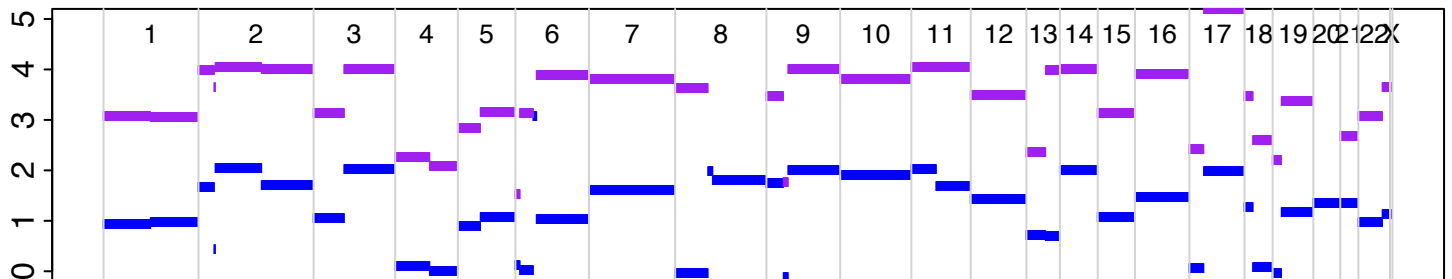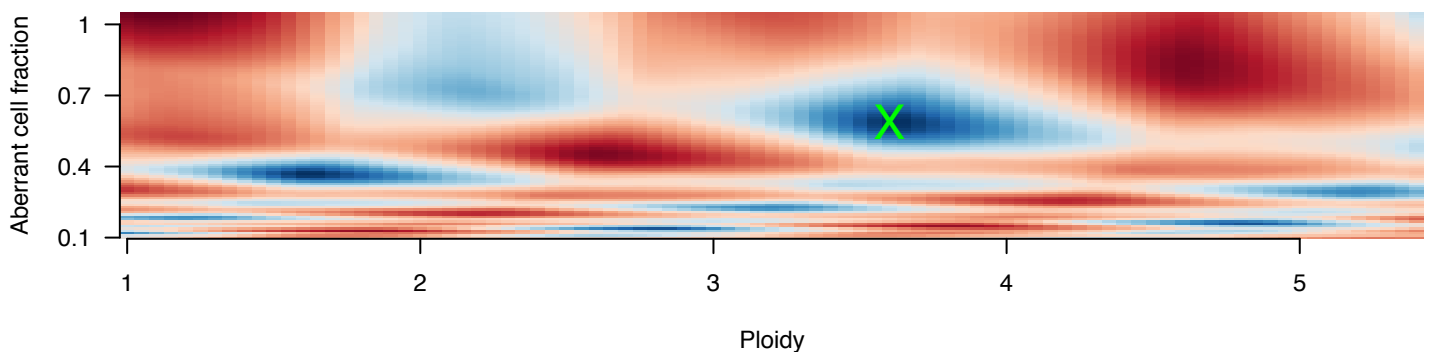

T\_T019D, LogR

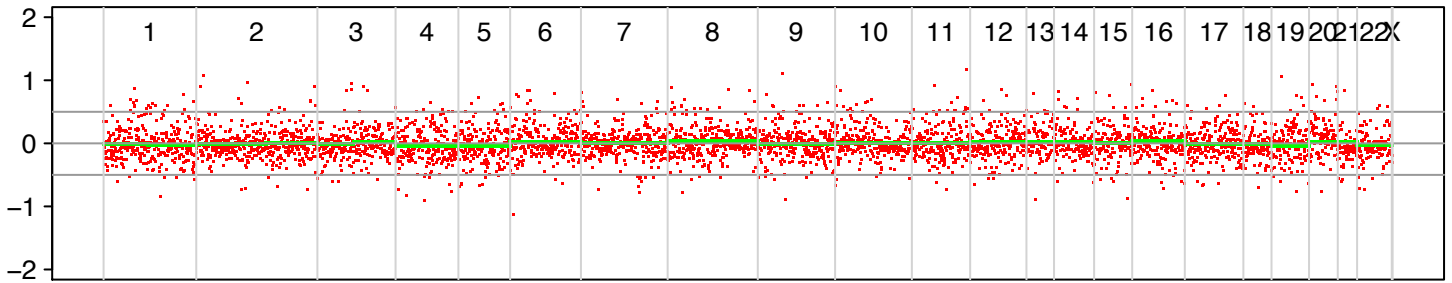

T\_T019D, BAF

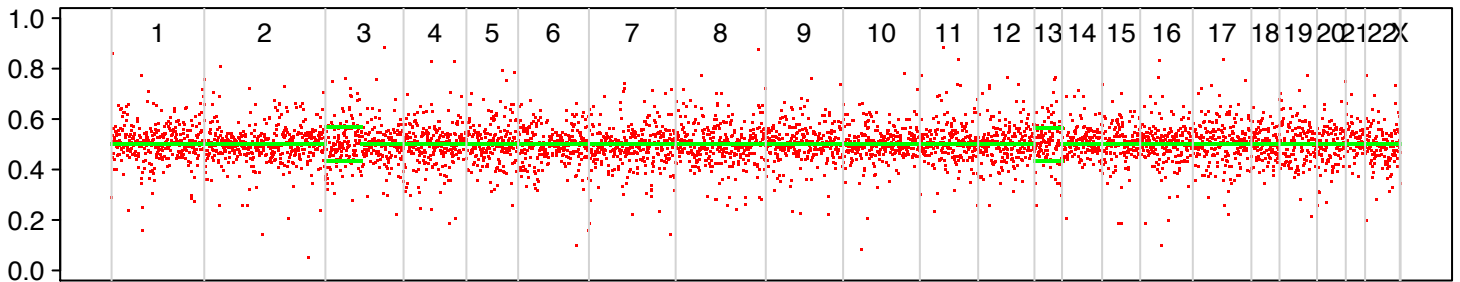

**Ploidy: 2.01, aberrant cell fraction: 27%, goodness of fit: 98.2%**

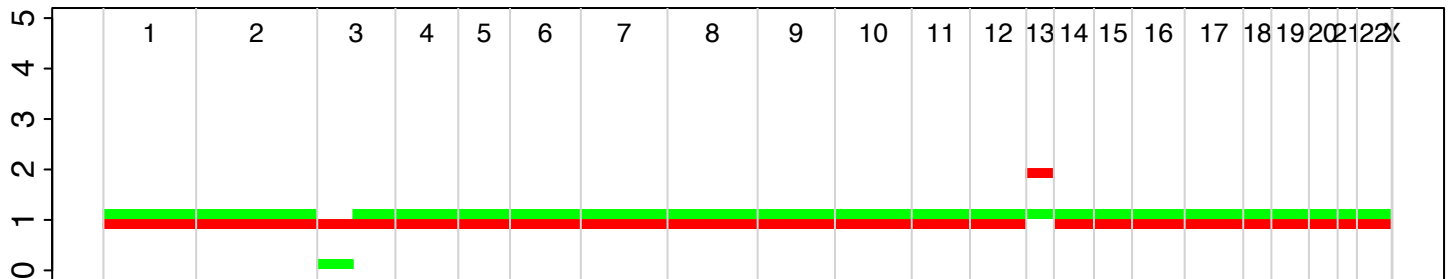

**Aberration reliability score (%), average: 43%**

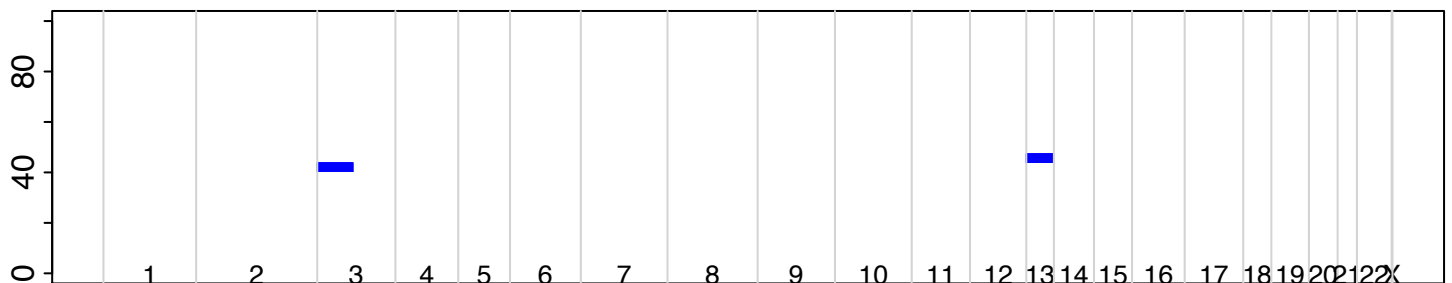

**Ploidy: 2.01, aberrant cell fraction: 27%, goodness of fit: 98.2%**

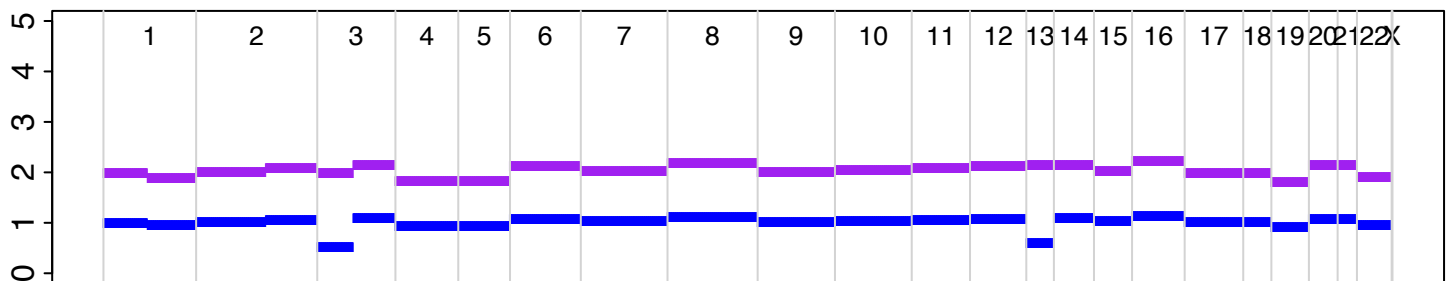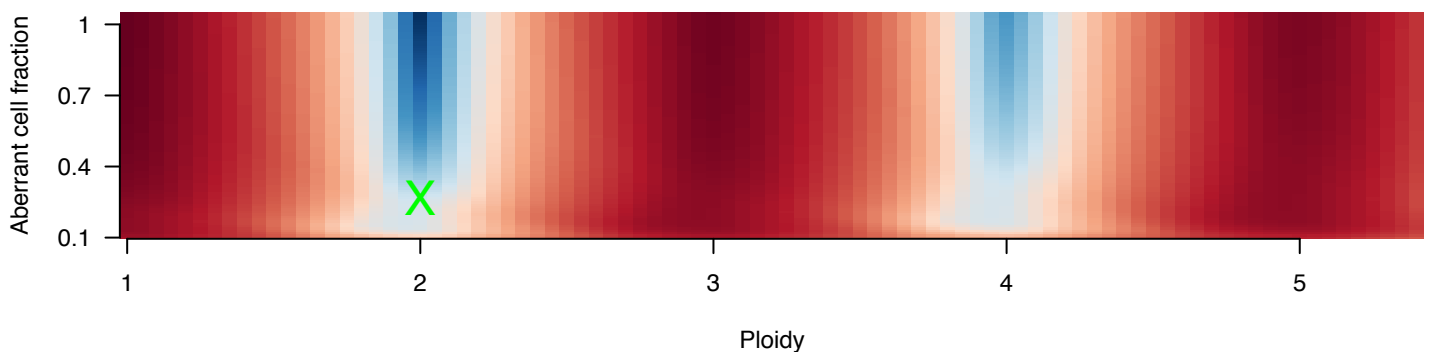

T\_T019E, LogR

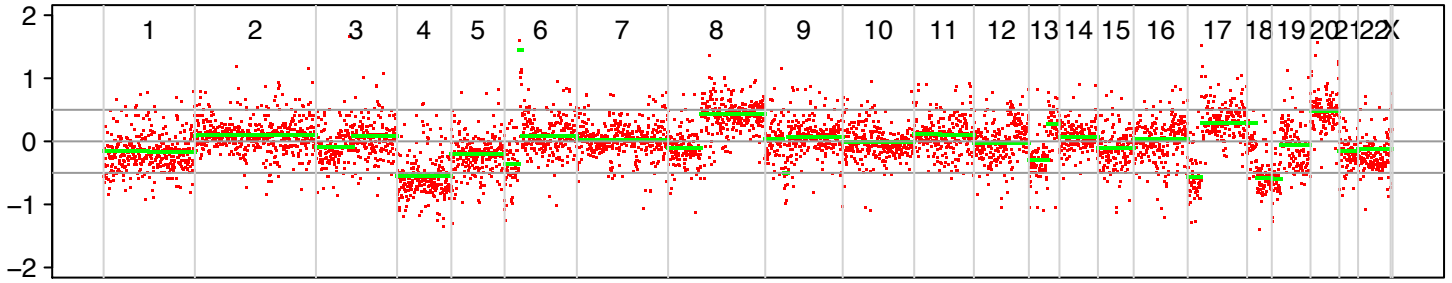

T\_T019E, BAF

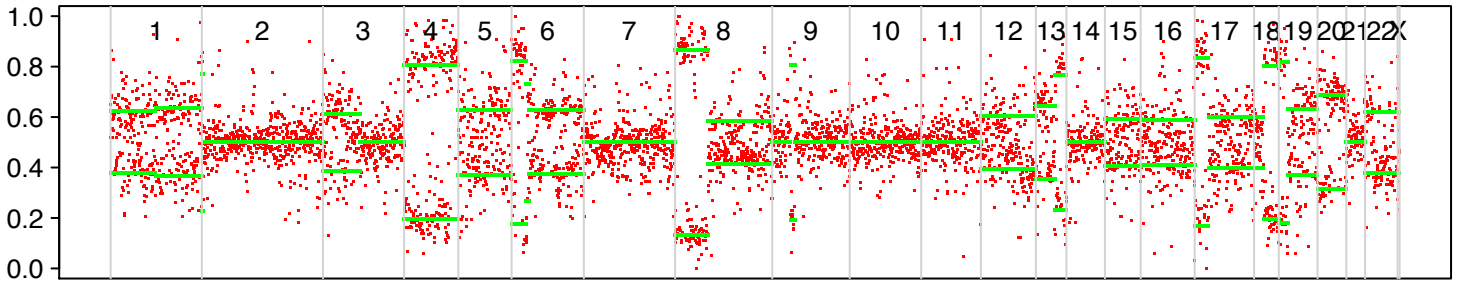

**Ploidy: 3.76, aberrant cell fraction: 62%, goodness of fit: 99.4%**

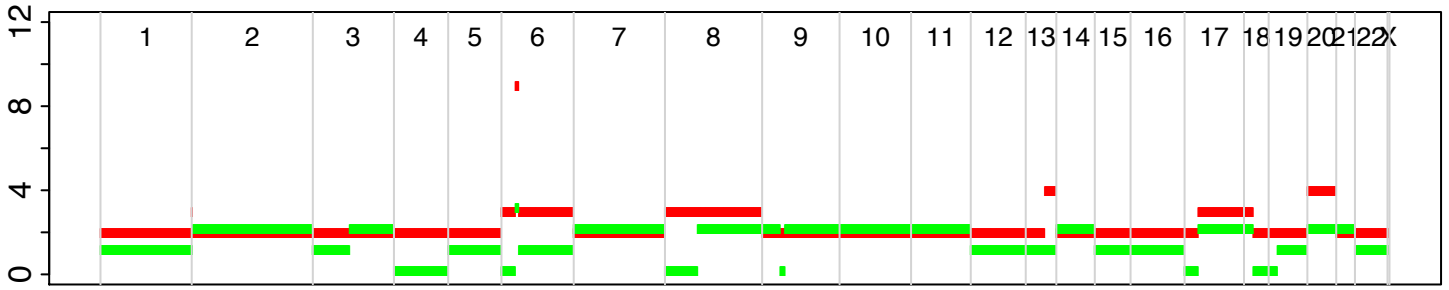

**Aberration reliability score (%), average: 68%**

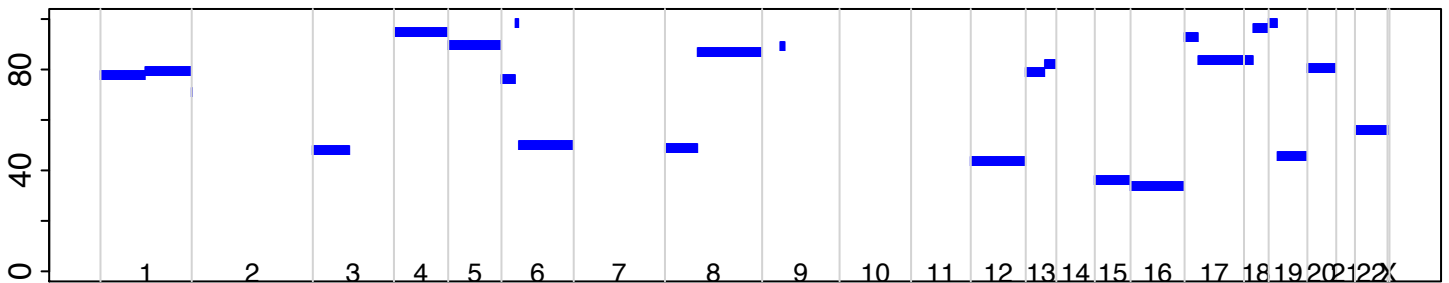

**Ploidy: 3.76, aberrant cell fraction: 62%, goodness of fit: 99.4%**

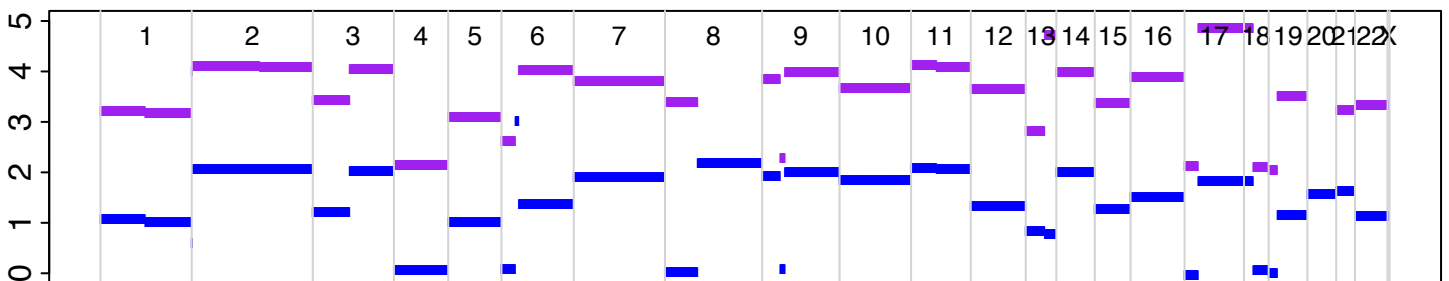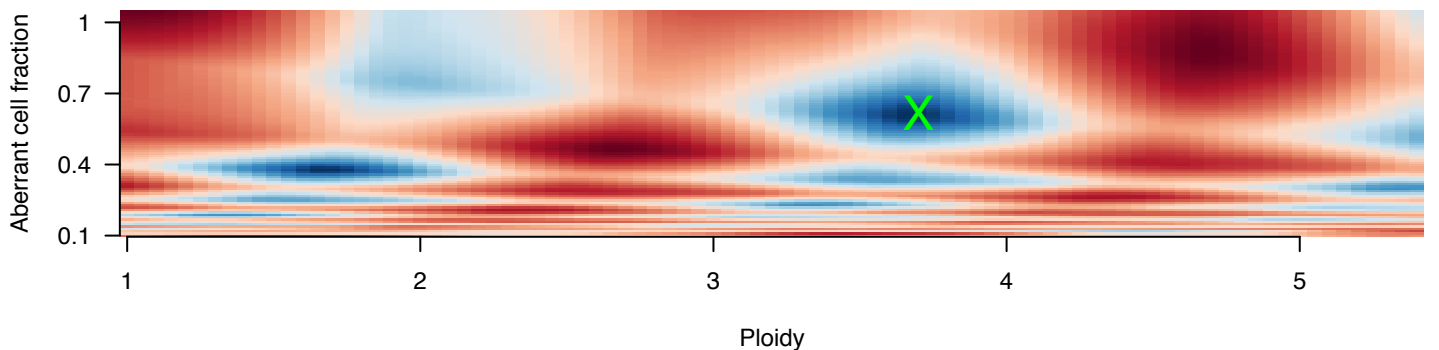

T\_520A, LogR

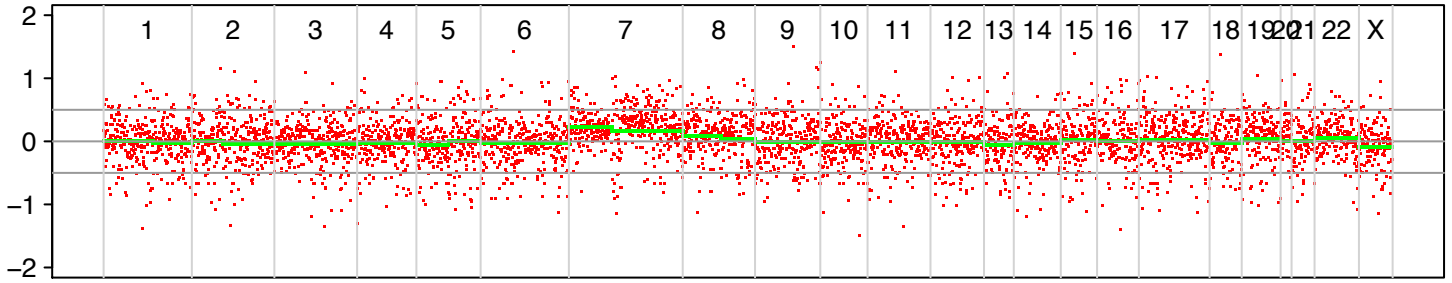

T\_520A, BAF

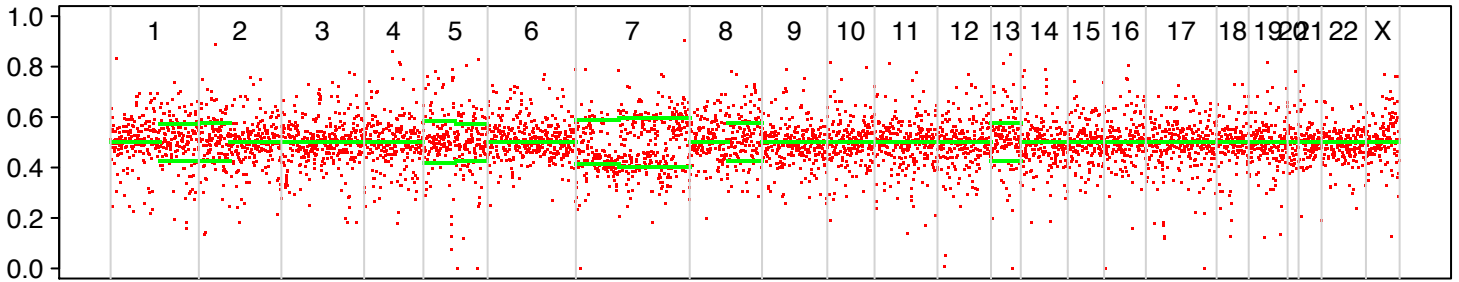

**Ploidy: 2.09, aberrant cell fraction: 37%, goodness of fit: 98.9%**

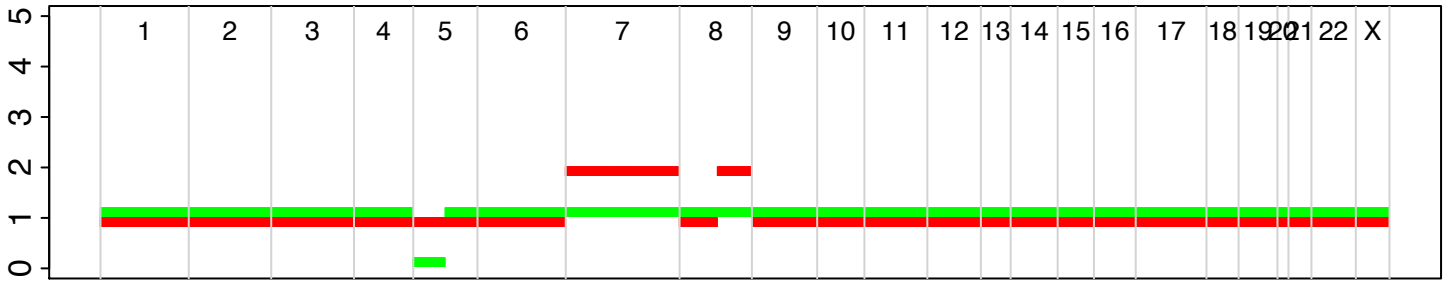

**Aberration reliability score (%), average: 66%**

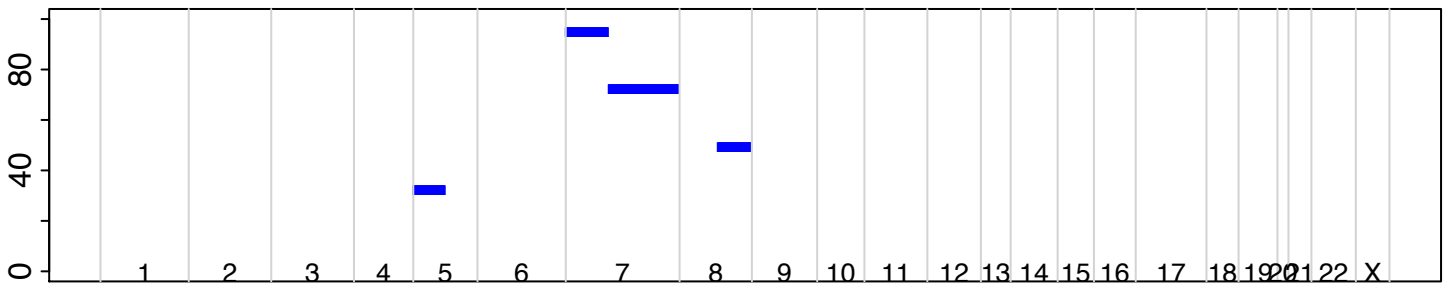

**Ploidy: 2.09, aberrant cell fraction: 37%, goodness of fit: 98.9%**

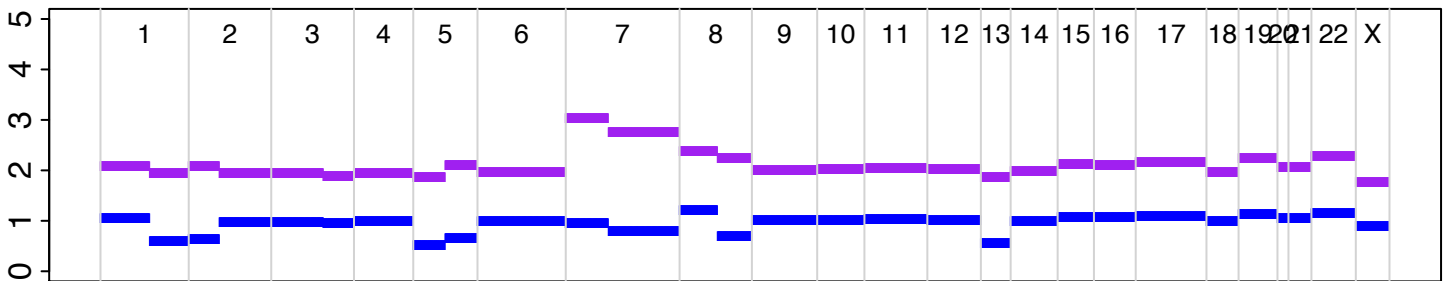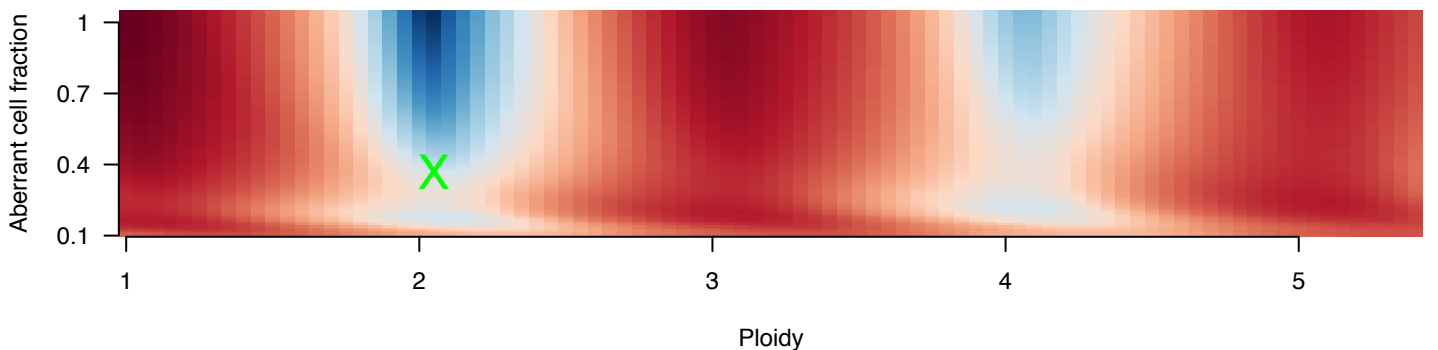

T\_520B, LogR

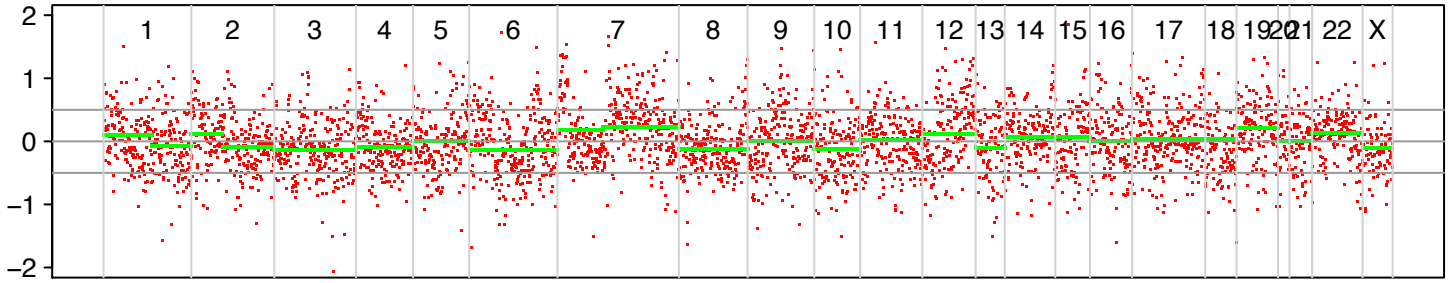

T\_520B, BAF

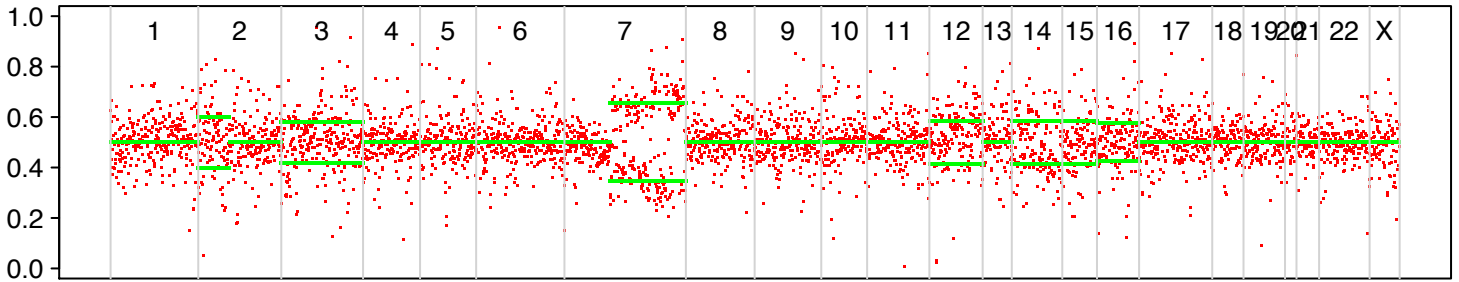

**Ploidy: 2.05, aberrant cell fraction: 44%, goodness of fit: 98.7%**

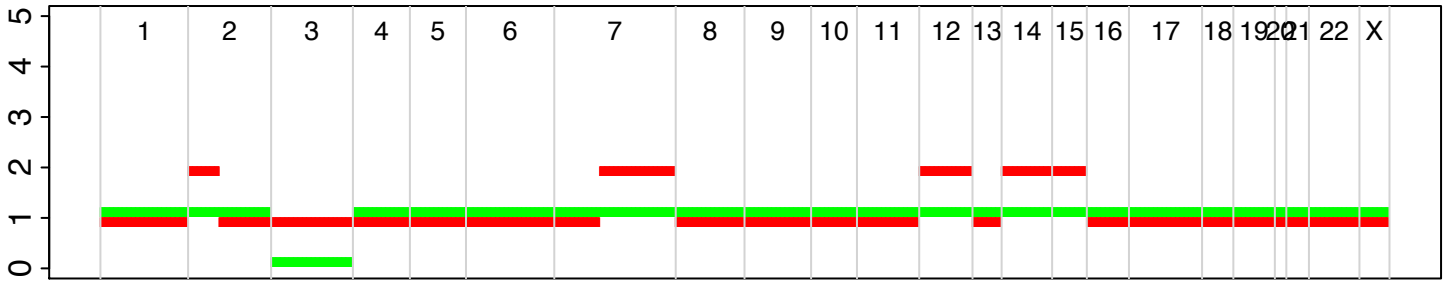

**Aberration reliability score (%), average: 43%**

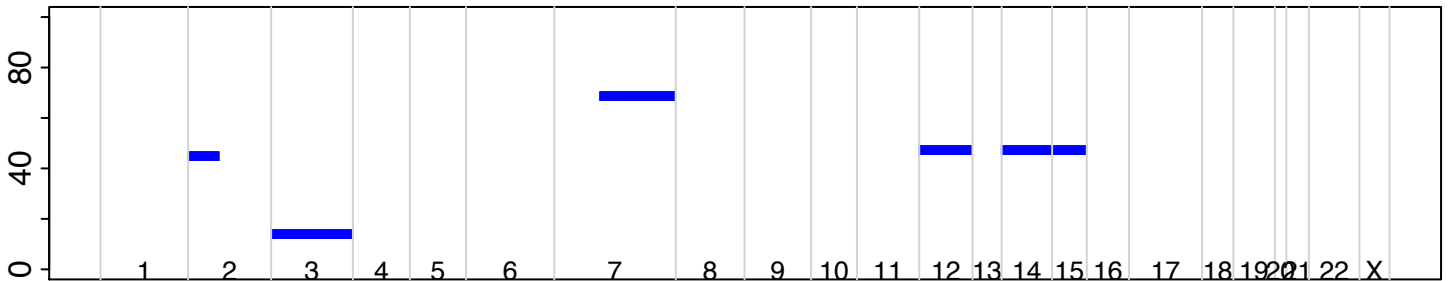

**Ploidy: 2.05, aberrant cell fraction: 44%, goodness of fit: 98.7%**

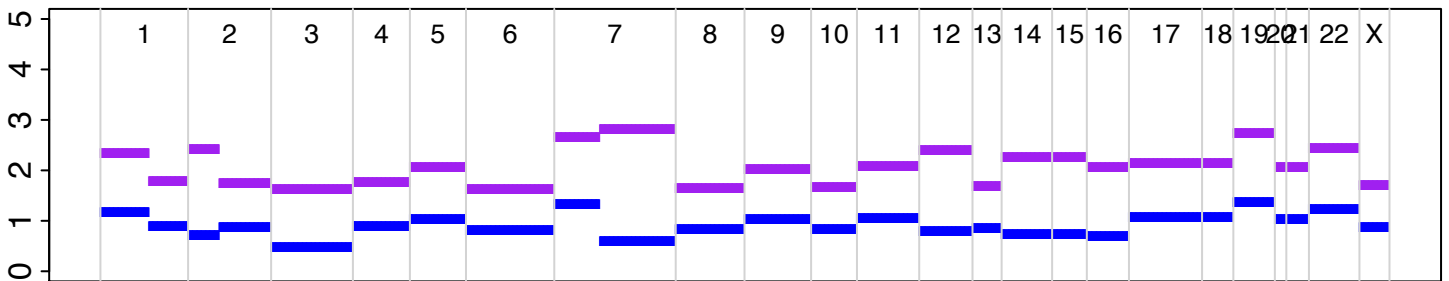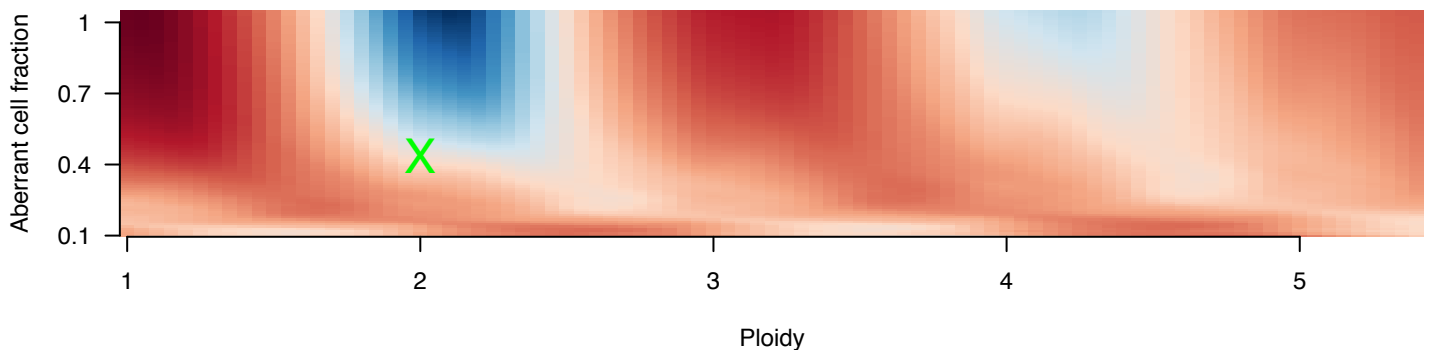

T\_520C, LogR

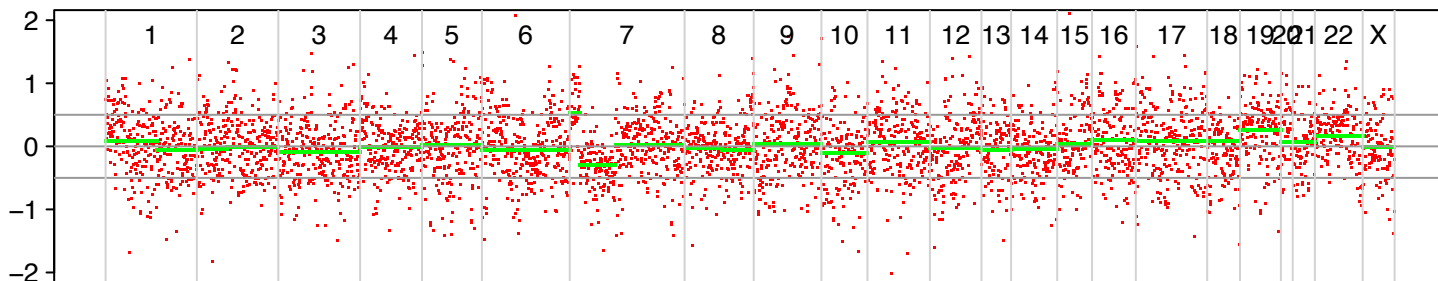

T\_520C, BAF

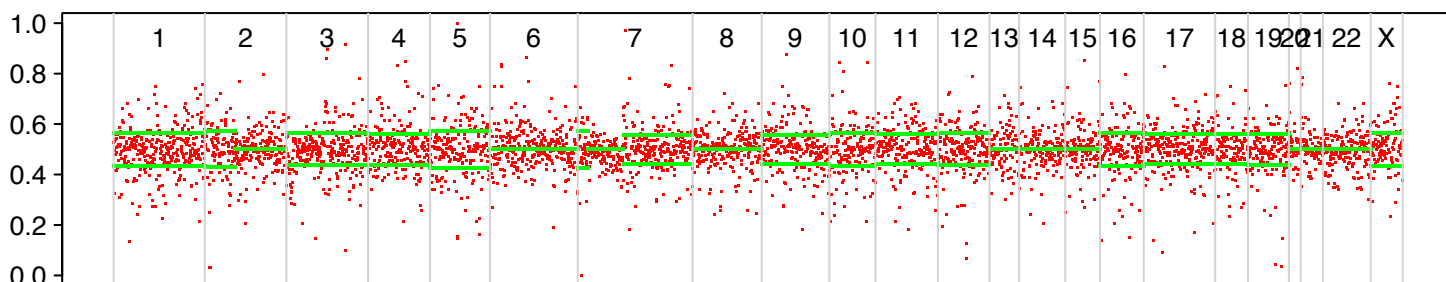

**Ploidy: 1.65, aberrant cell fraction: 20%, goodness of fit: 99.2%**

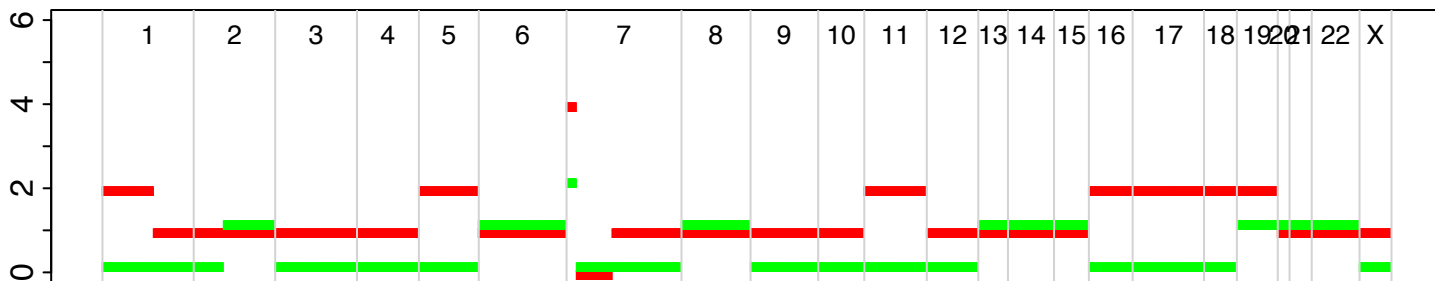

**Aberration reliability score (%), average: 72%**

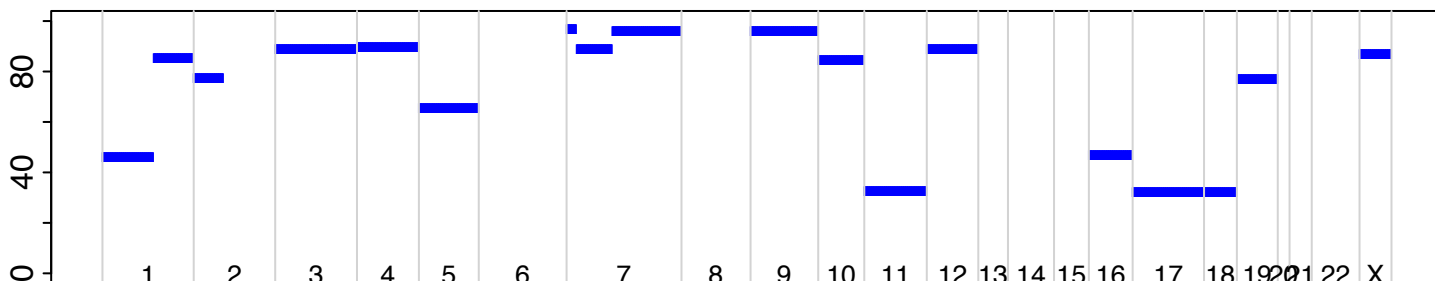

**Ploidy: 1.65, aberrant cell fraction: 20%, goodness of fit: 99.2%**

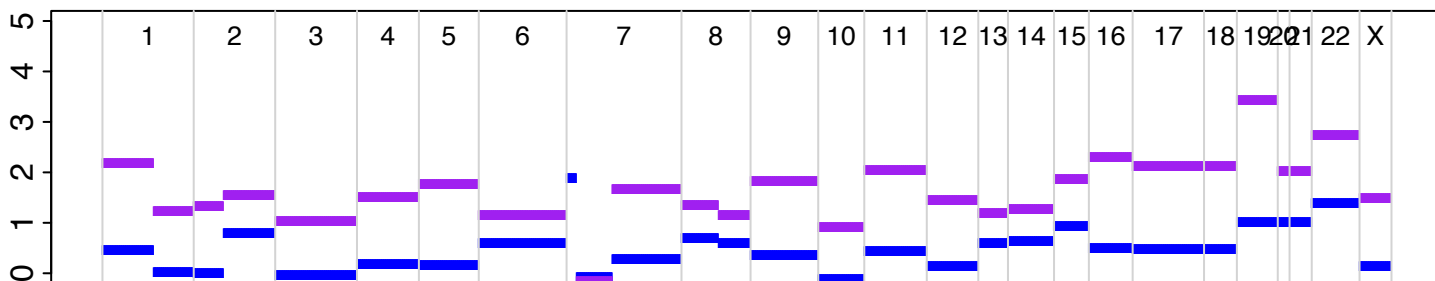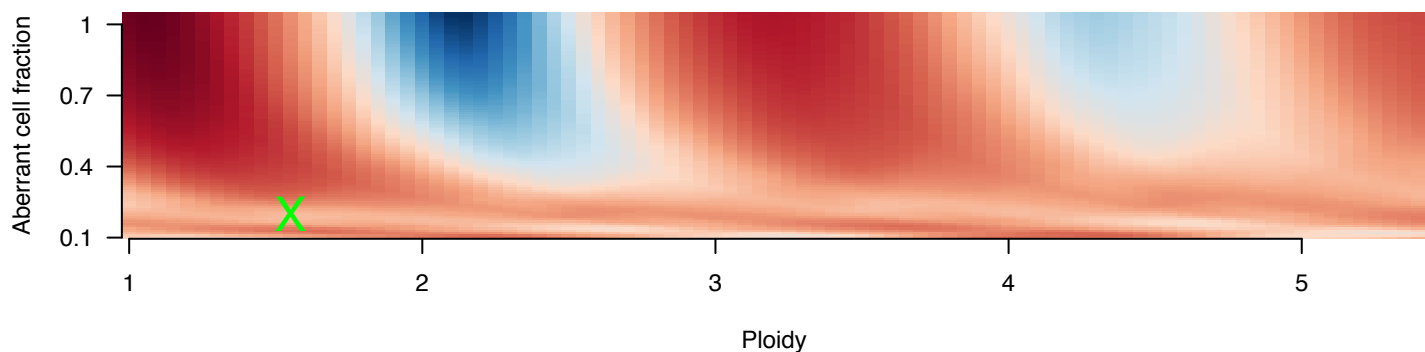



T\_520D, LogR

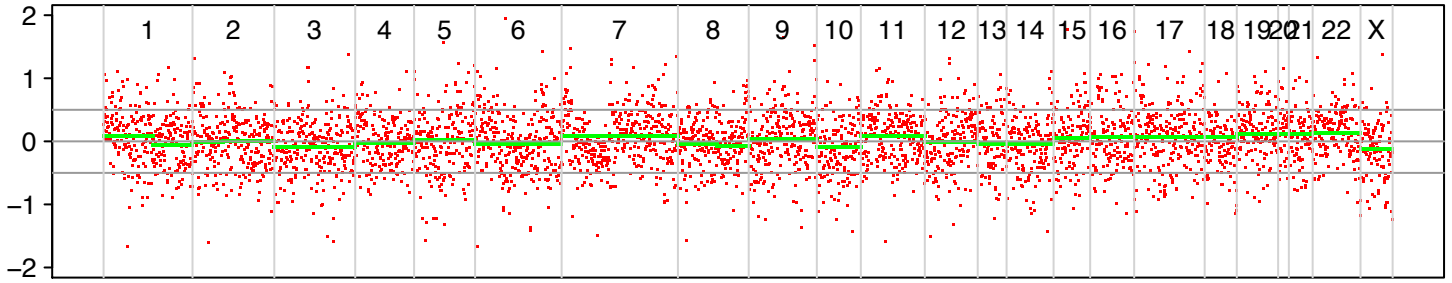

T\_520D, BAF

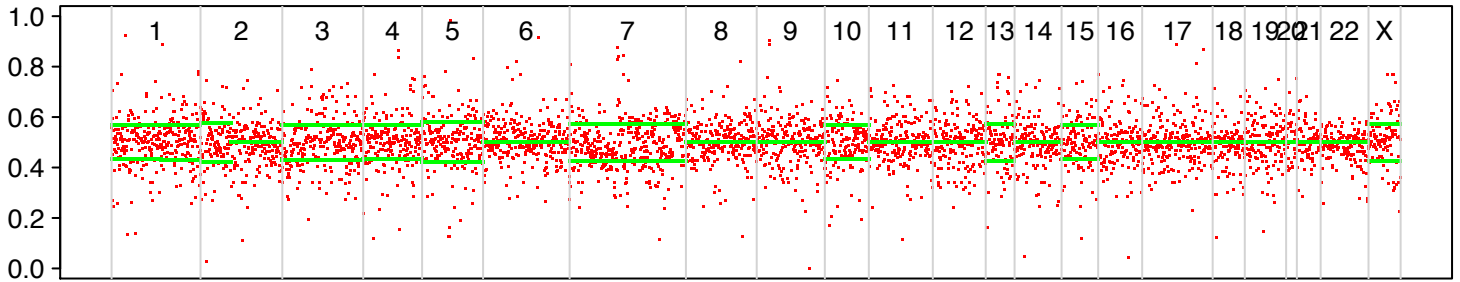

**Ploidy: 1.65, aberrant cell fraction: 21%, goodness of fit: 99.2%**

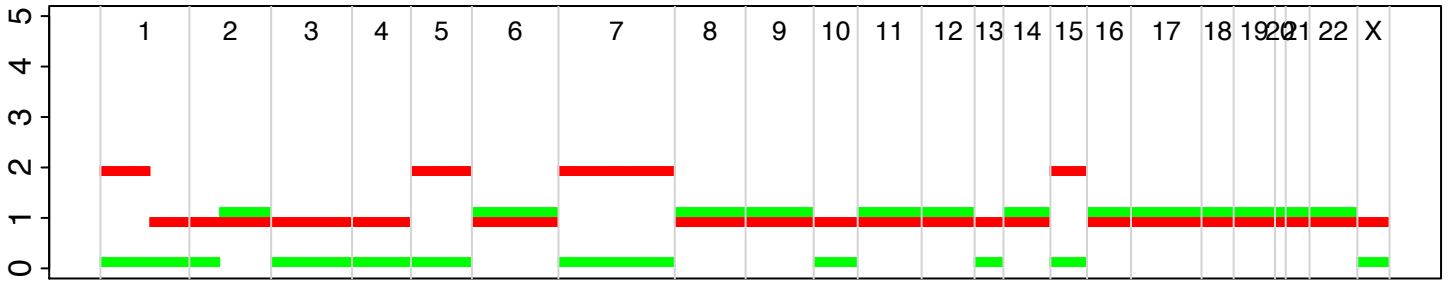

**Aberration reliability score (%), average: 71%**

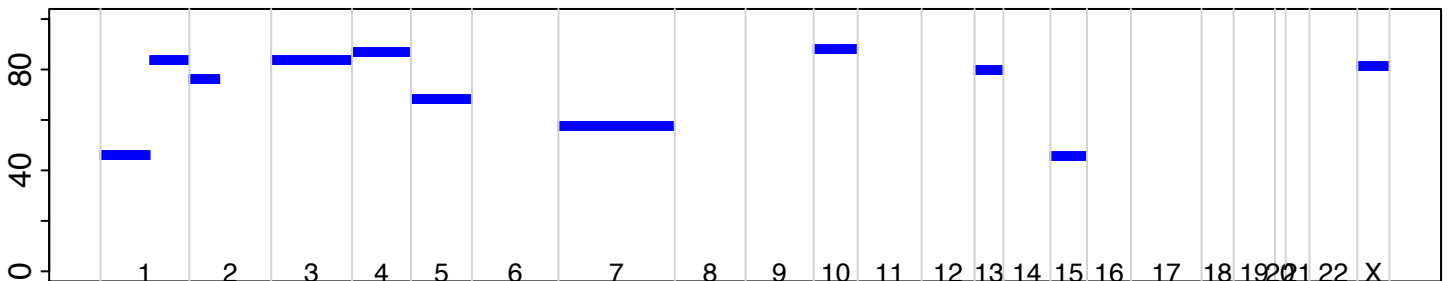

**Ploidy: 1.65, aberrant cell fraction: 21%, goodness of fit: 99.2%**

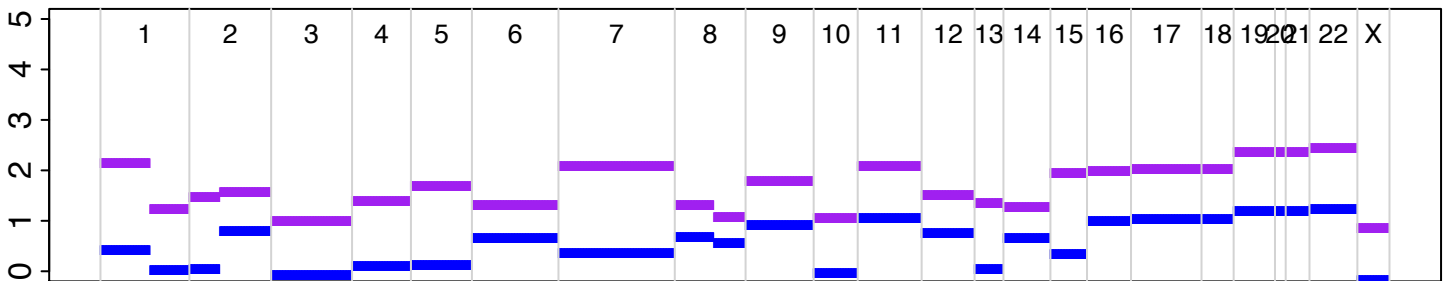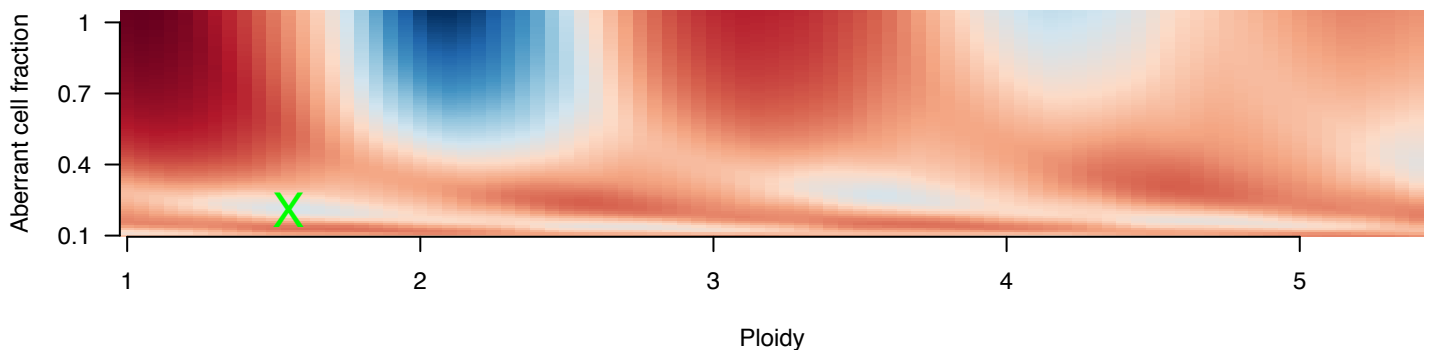

T\_520E, LogR

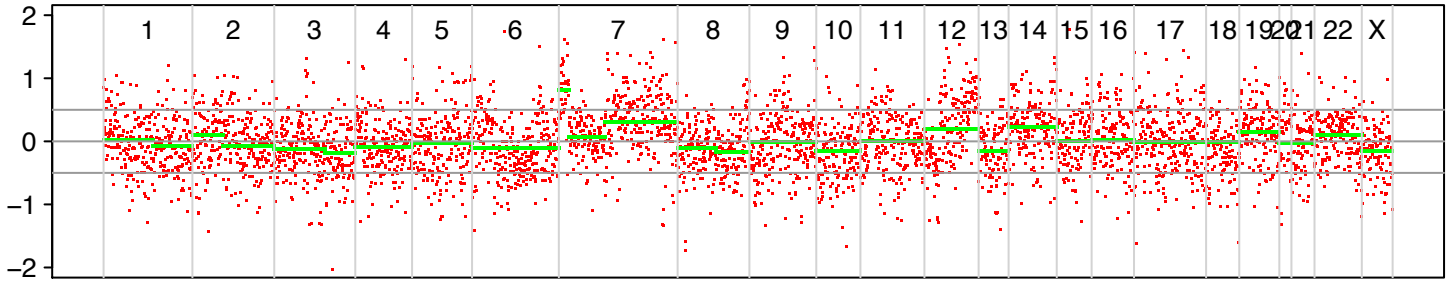

T\_520E, BAF

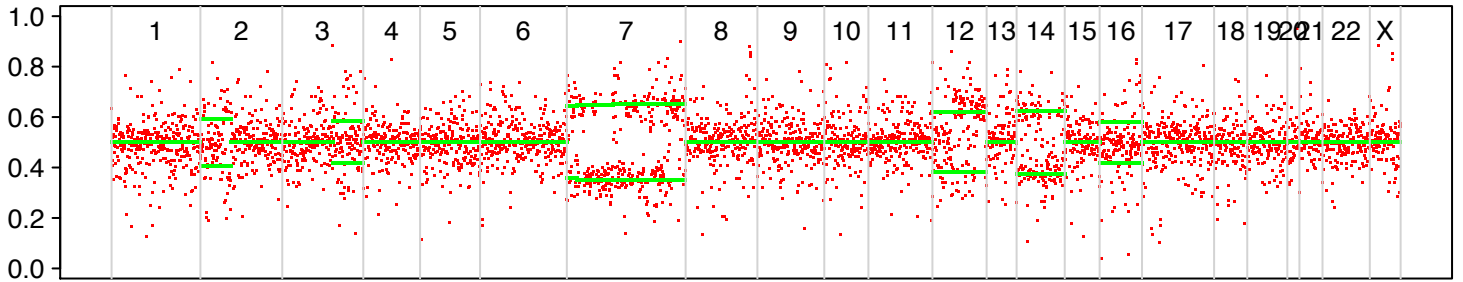

**Ploidy: 2.25, aberrant cell fraction: 46%, goodness of fit: 98.6%**

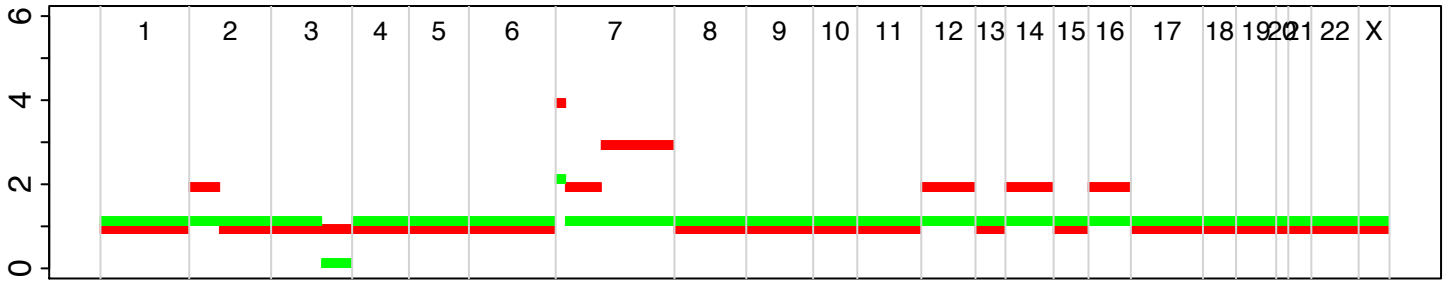

**Aberration reliability score (%), average: 59%**

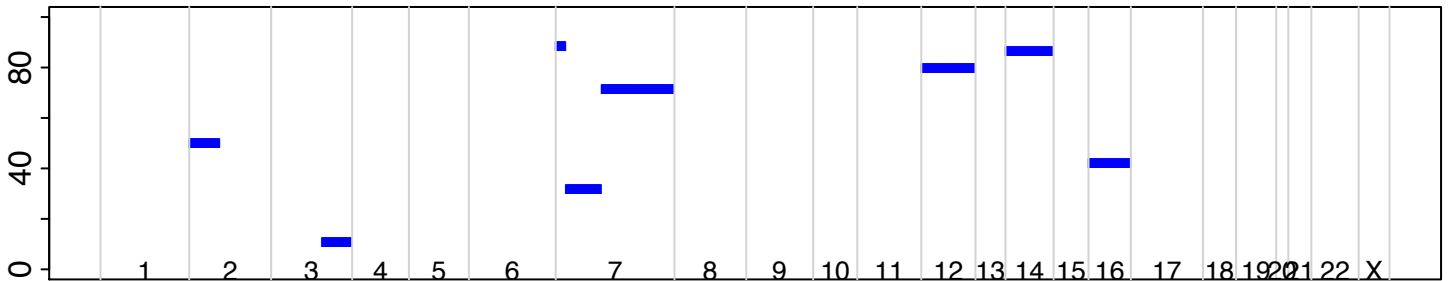

**Ploidy: 2.25, aberrant cell fraction: 46%, goodness of fit: 98.6%**

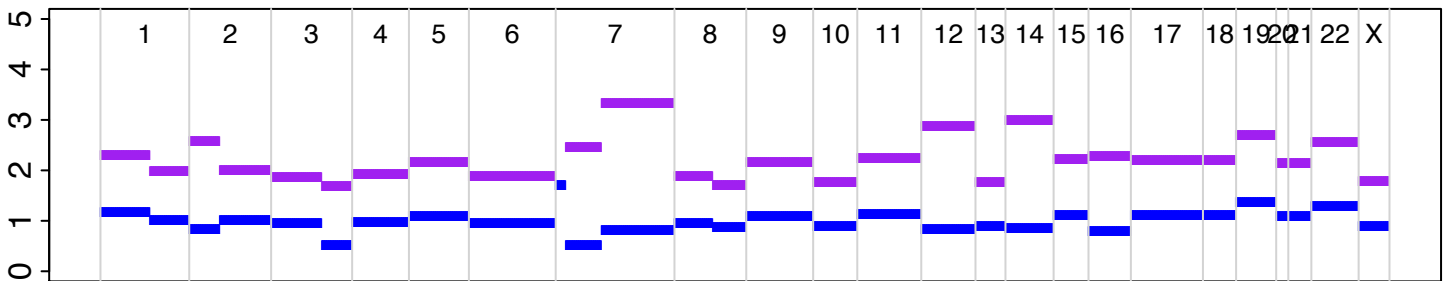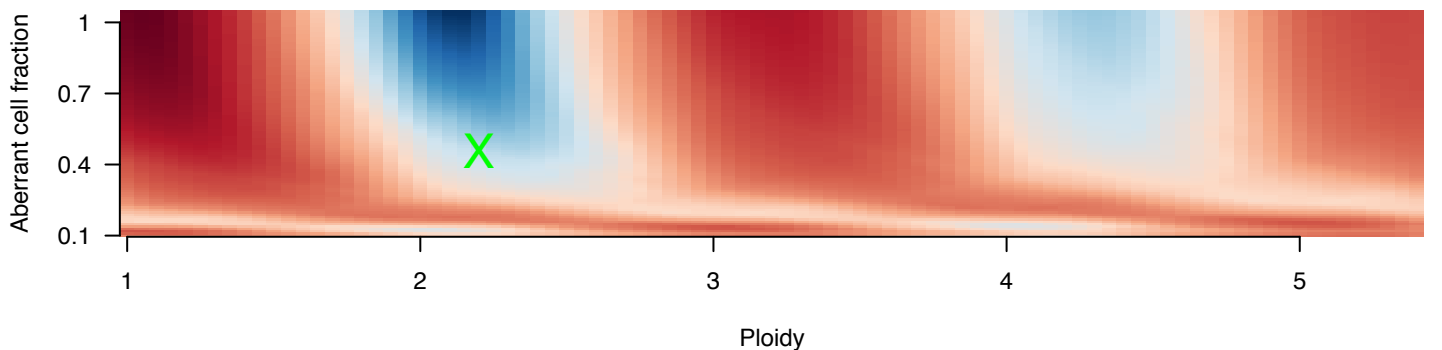

T\_699A, LogR

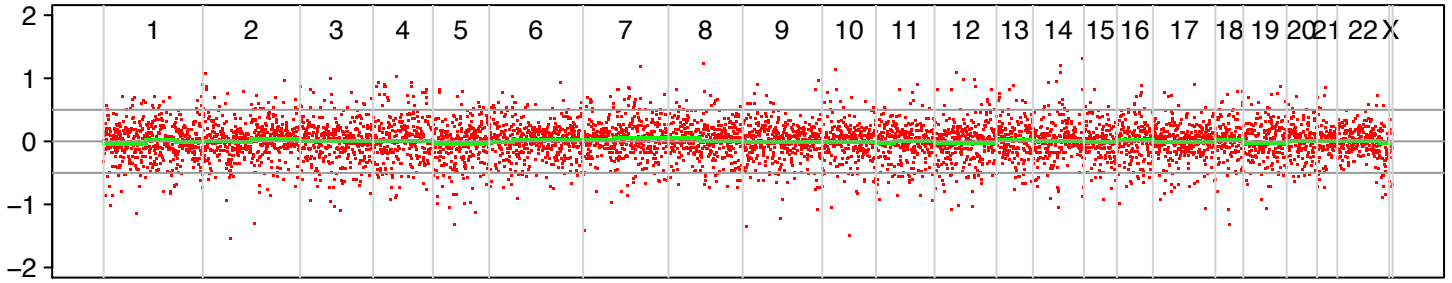

T\_699A, BAF

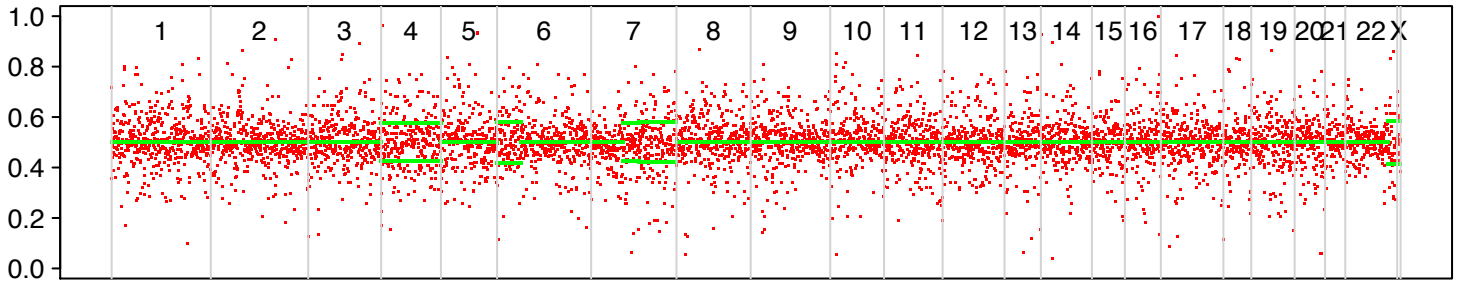

**Ploidy: 1.96, aberrant cell fraction: 20%, goodness of fit: 98.9%**

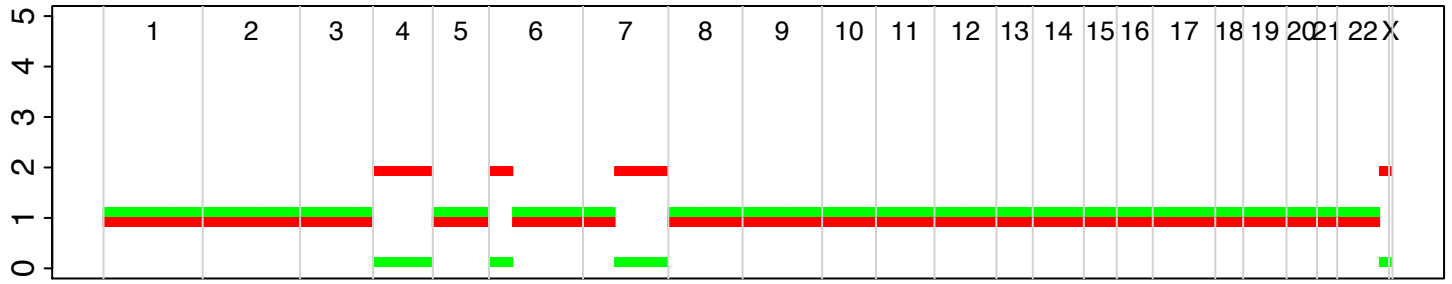

**Aberration reliability score (%), average: 72%**

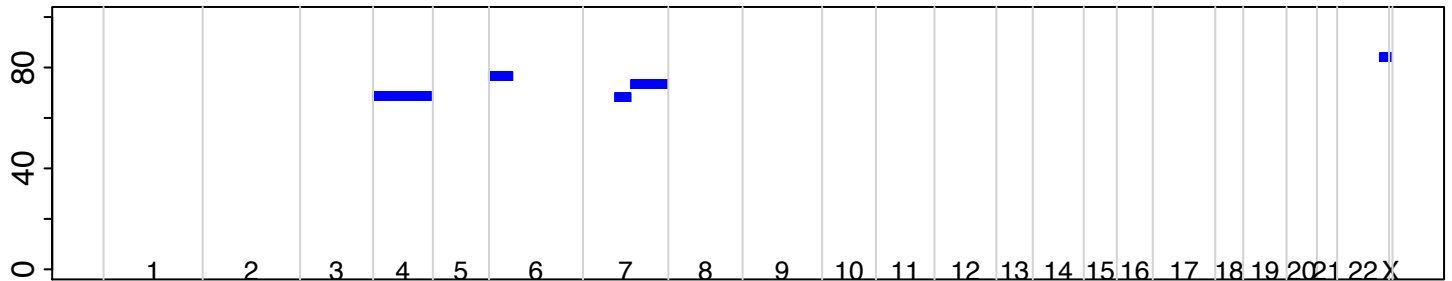

**Ploidy: 1.96, aberrant cell fraction: 20%, goodness of fit: 98.9%**

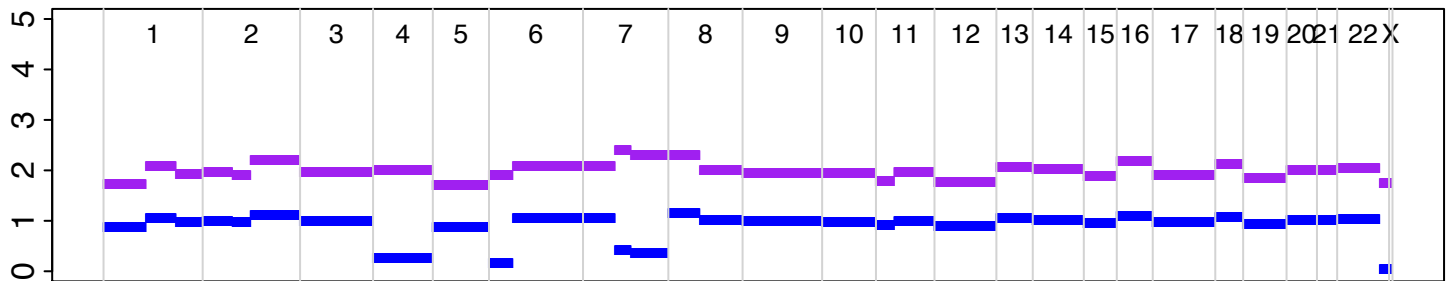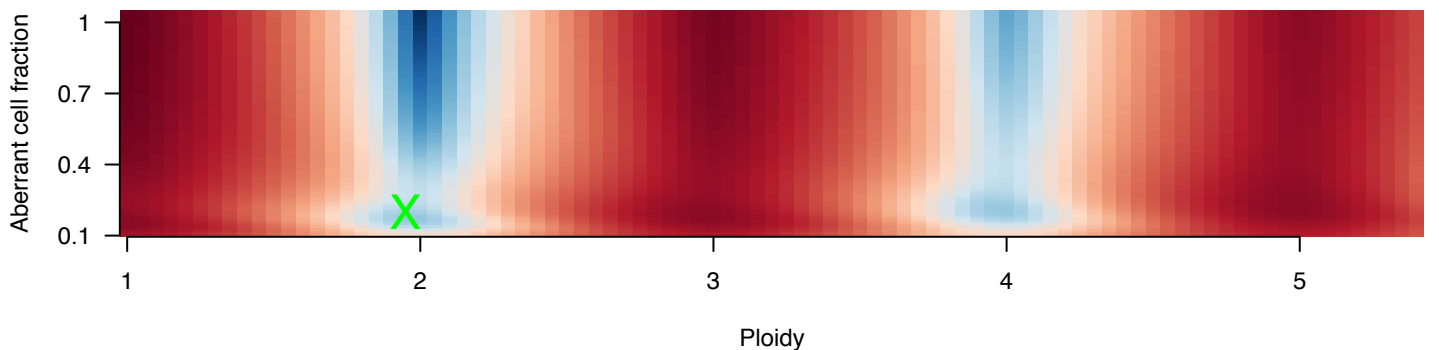

T\_699B, LogR

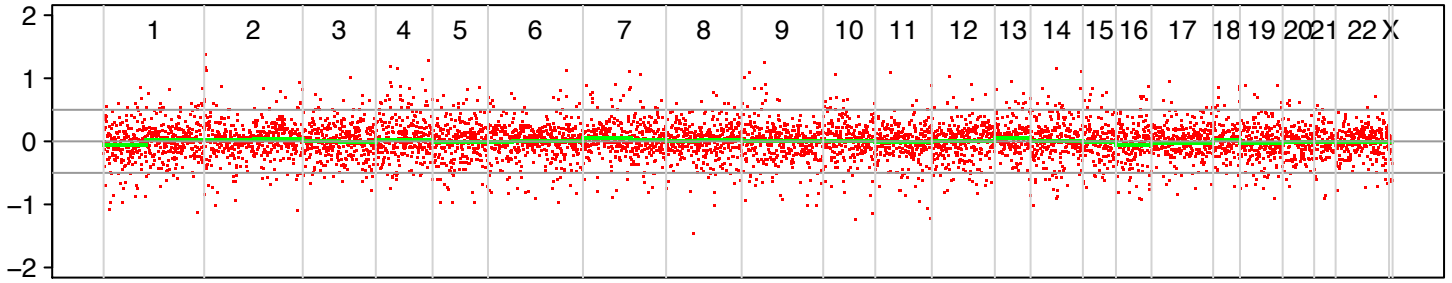

T\_699B, BAF

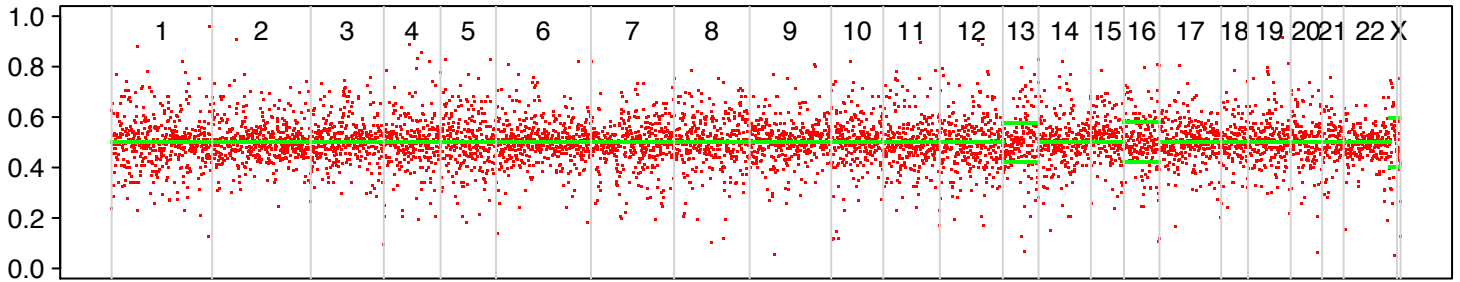

**Ploidy: 1.98, aberrant cell fraction: 20%, goodness of fit: 98.8%**

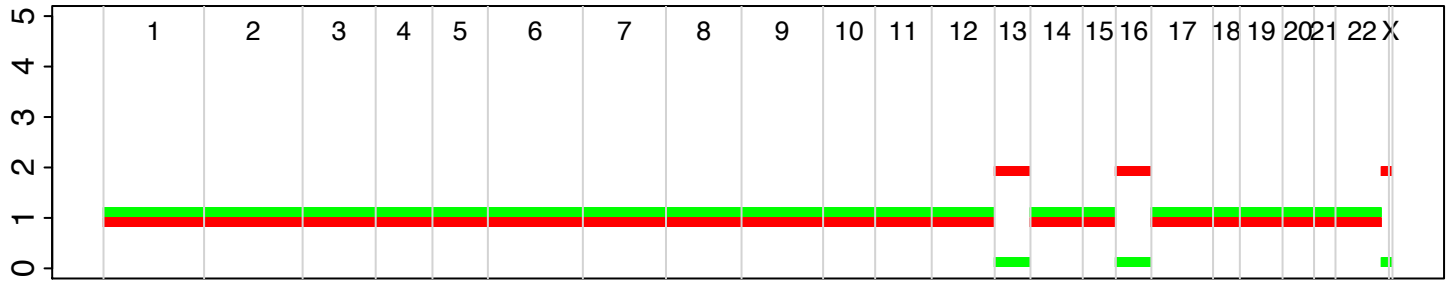

**Aberration reliability score (%), average: 75%**

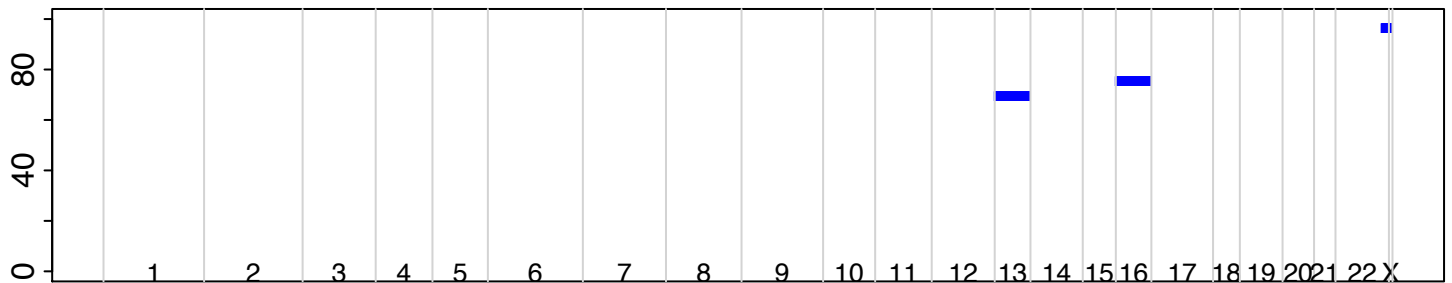

**Ploidy: 1.98, aberrant cell fraction: 20%, goodness of fit: 98.8%**

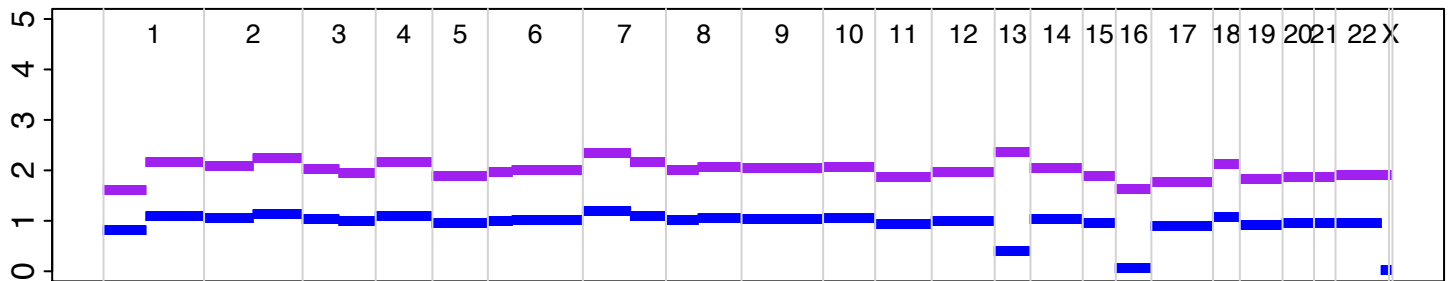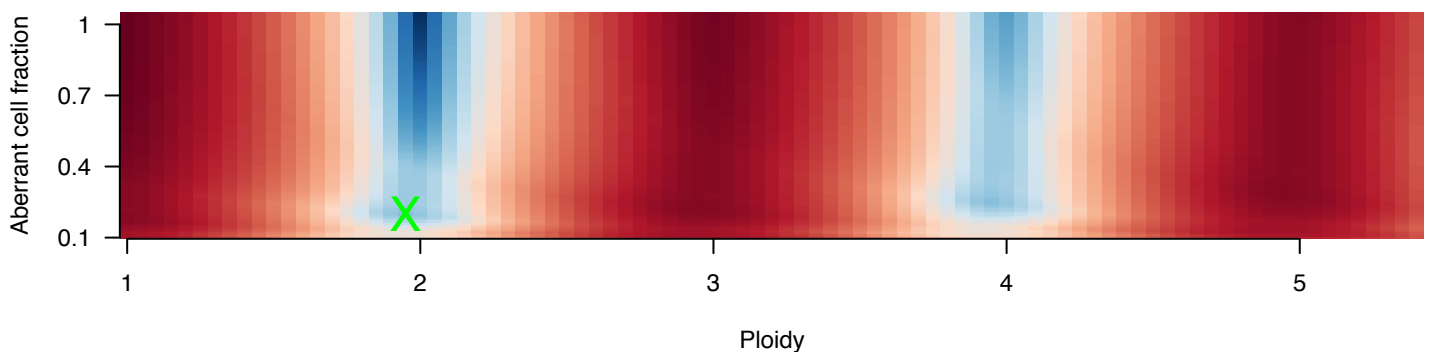

T\_699C, LogR

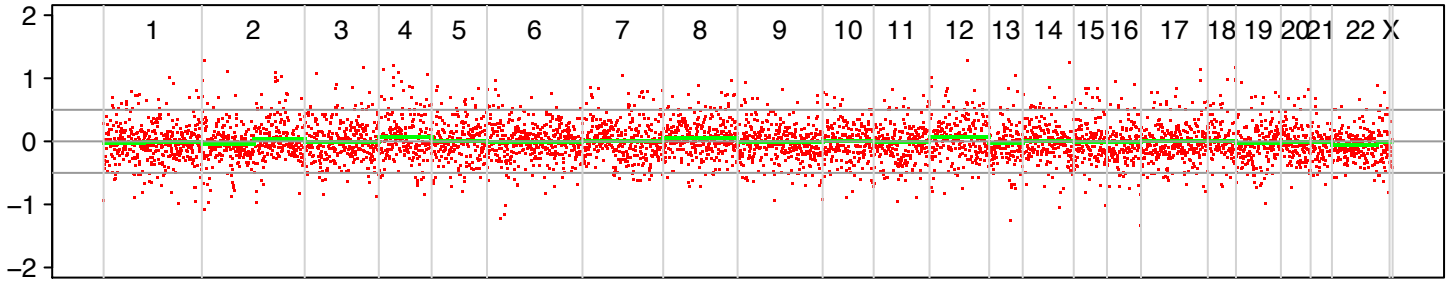

T\_699C, BAF

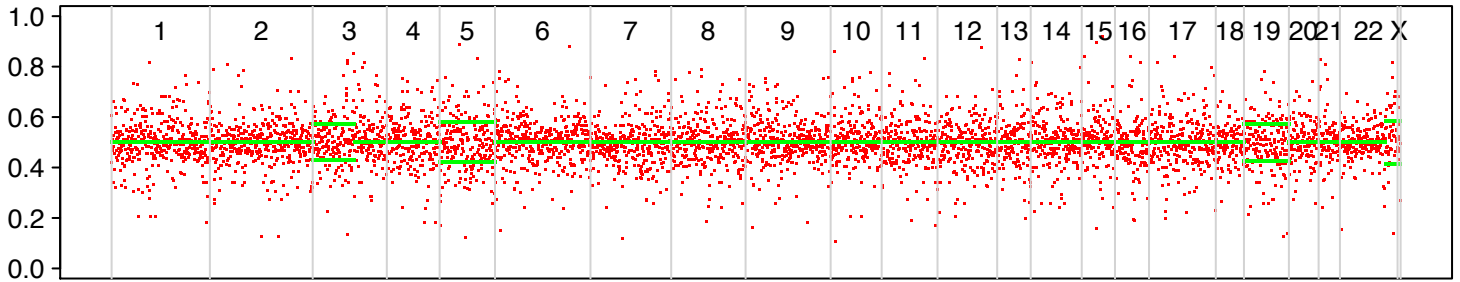

**Ploidy: 2.02, aberrant cell fraction: 20%, goodness of fit: 98.8%**

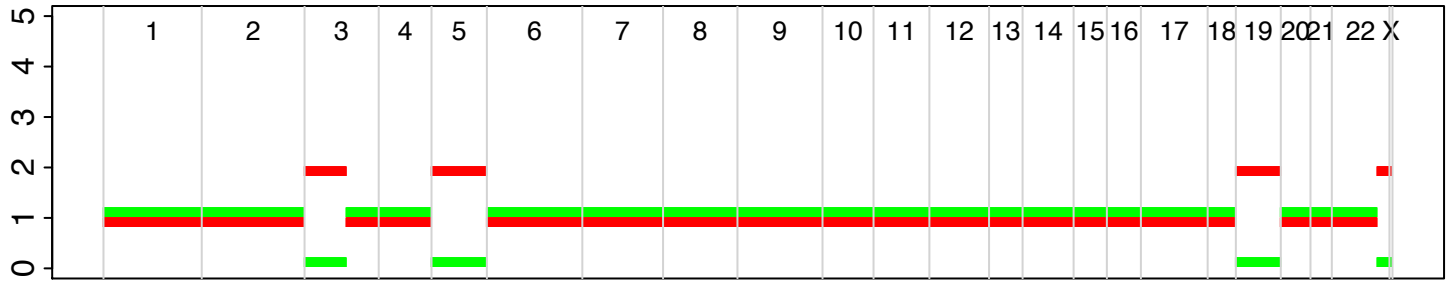

**Aberration reliability score (%), average: 69%**

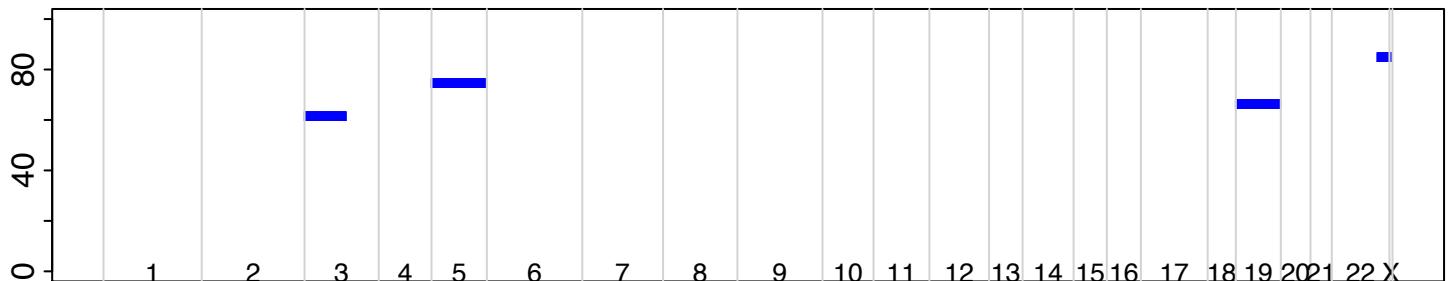

**Ploidy: 2.02, aberrant cell fraction: 20%, goodness of fit: 98.8%**

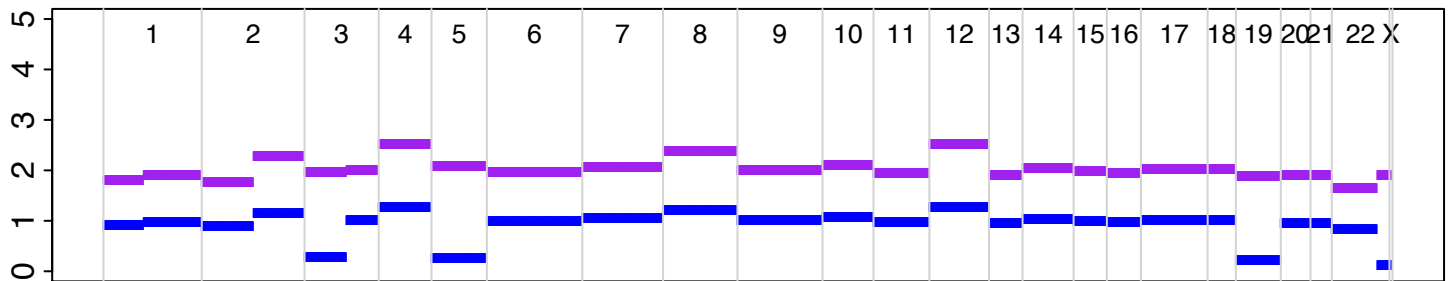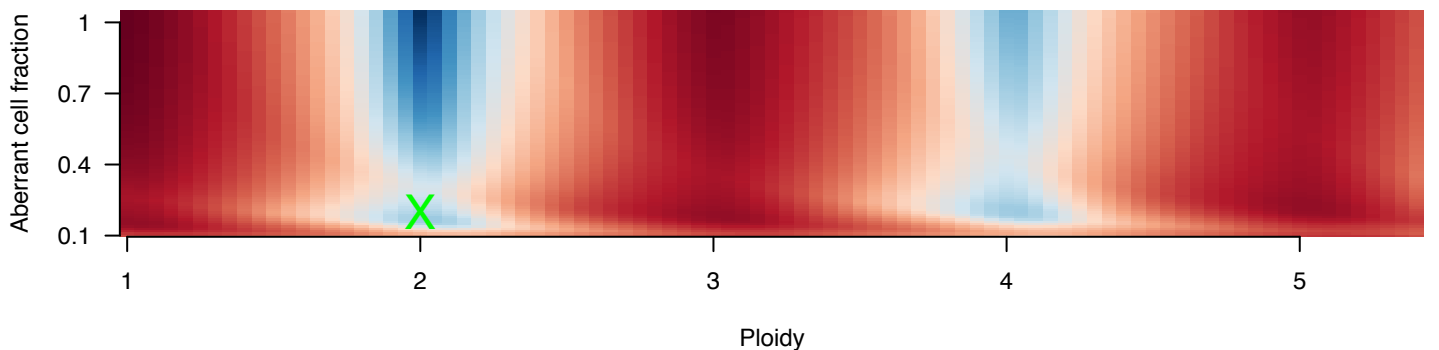

T\_699D, LogR

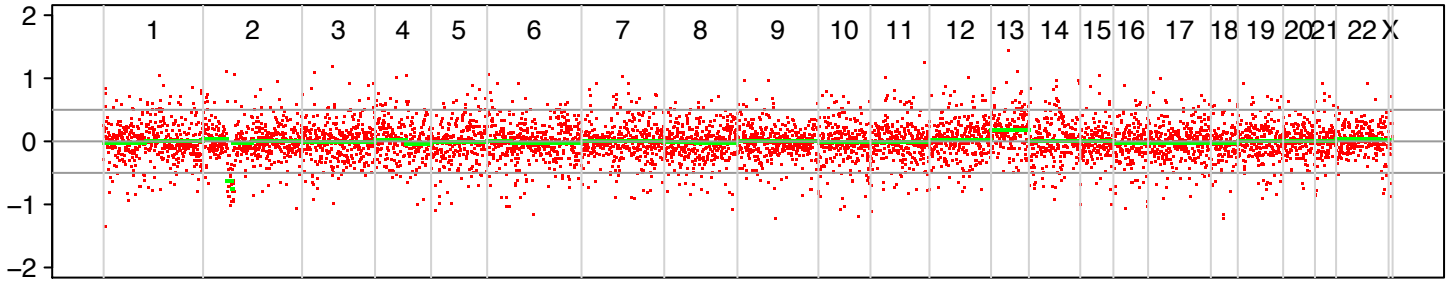

T\_699D, BAF

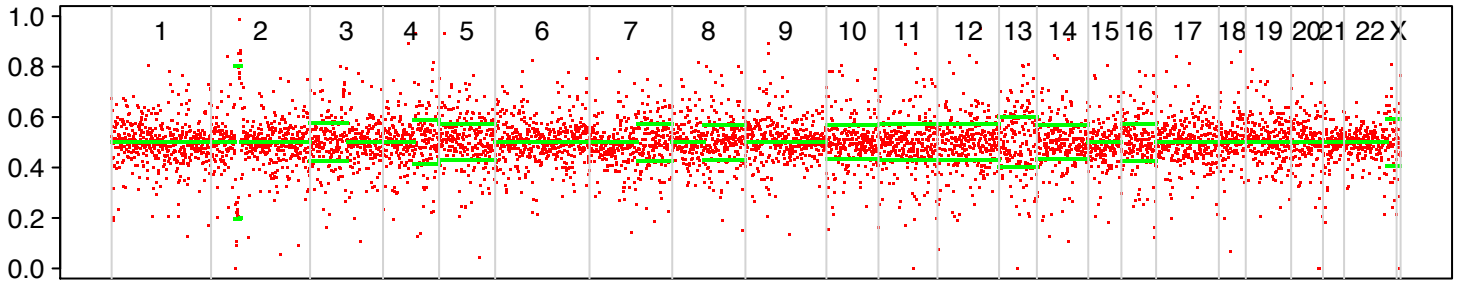

**Ploidy: 2.05, aberrant cell fraction: 38%, goodness of fit: 99.2%**

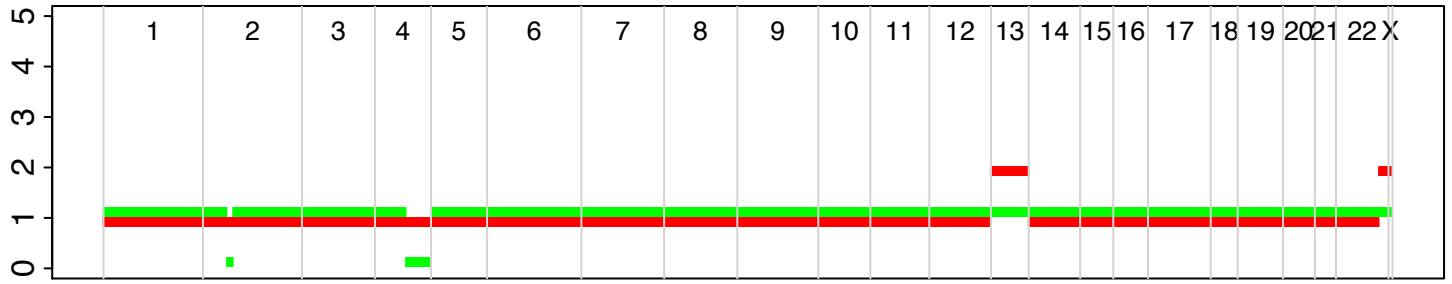

**Aberration reliability score (%), average: 53%**

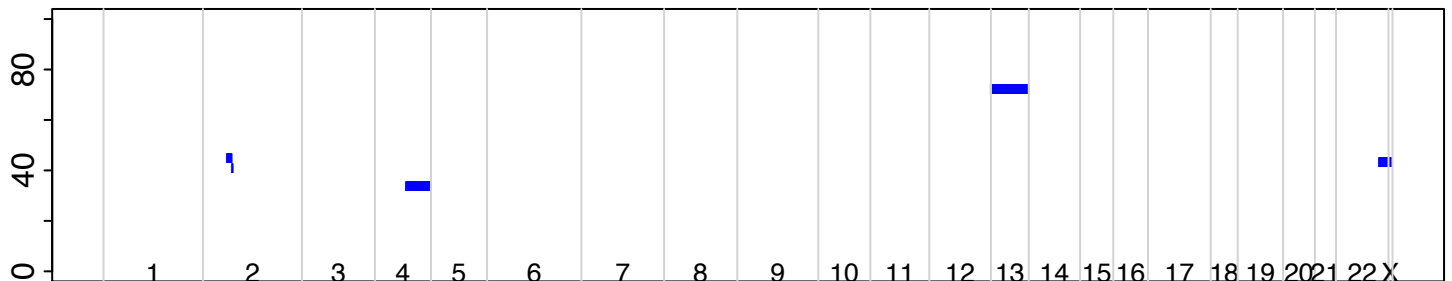

**Ploidy: 2.05, aberrant cell fraction: 38%, goodness of fit: 99.2%**

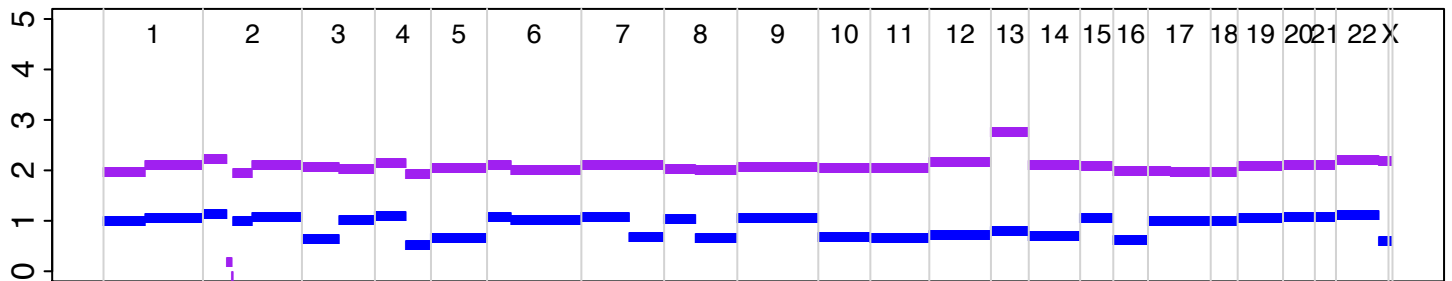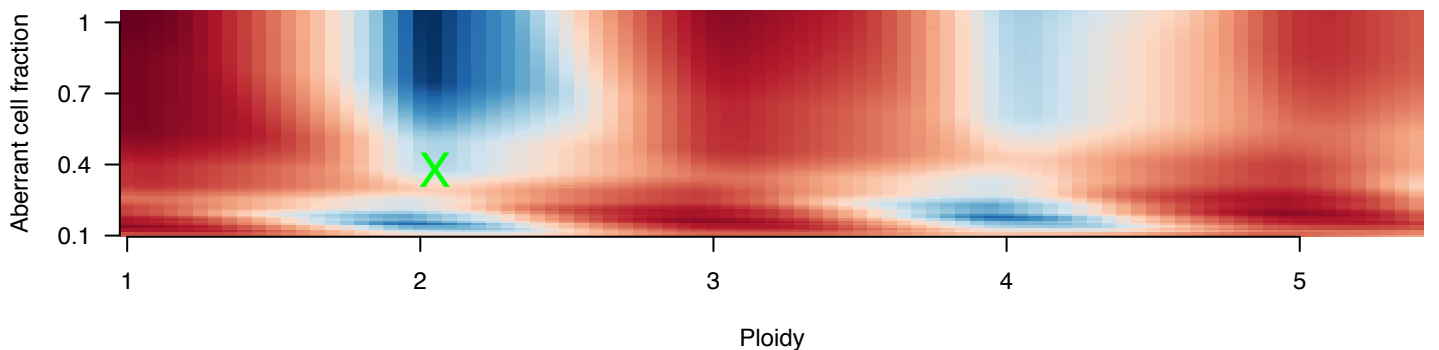

T\_699E, LogR

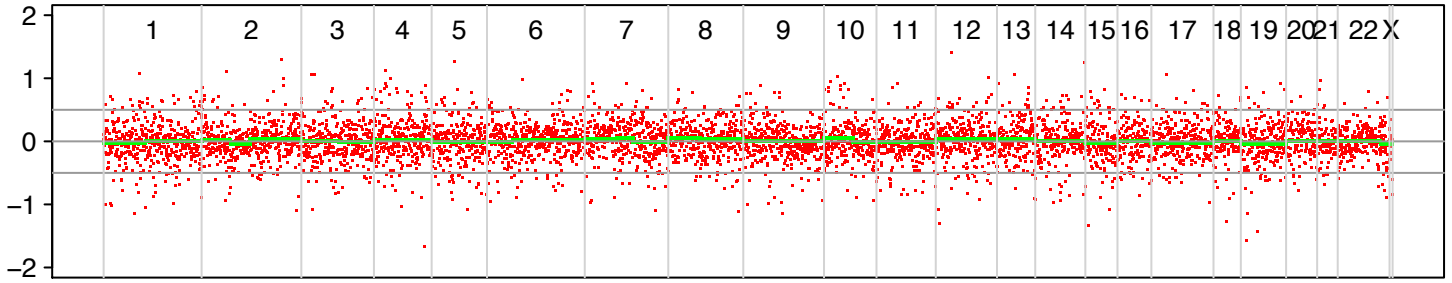

T\_699E, BAF

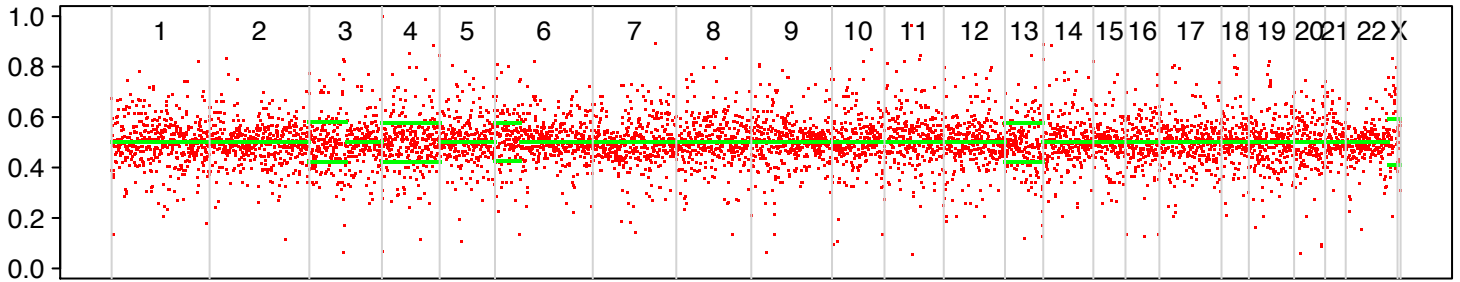

**Ploidy: 1.99, aberrant cell fraction: 20%, goodness of fit: 98.8%**

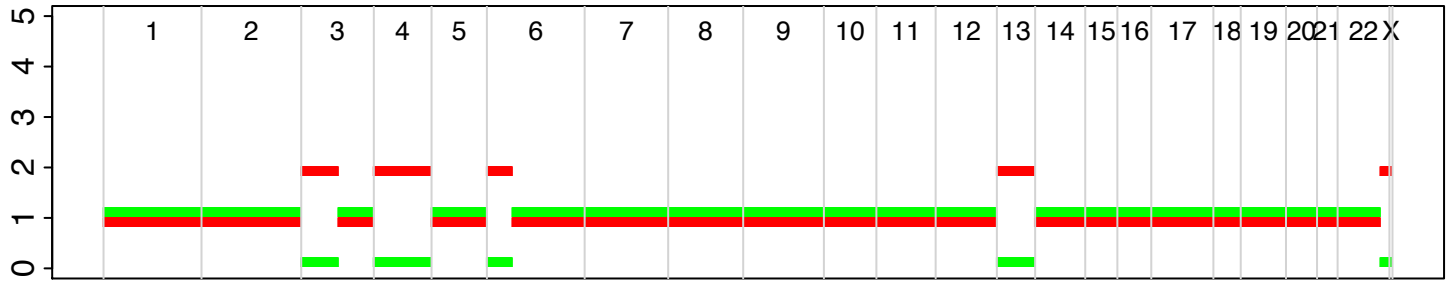

**Aberration reliability score (%), average: 72%**

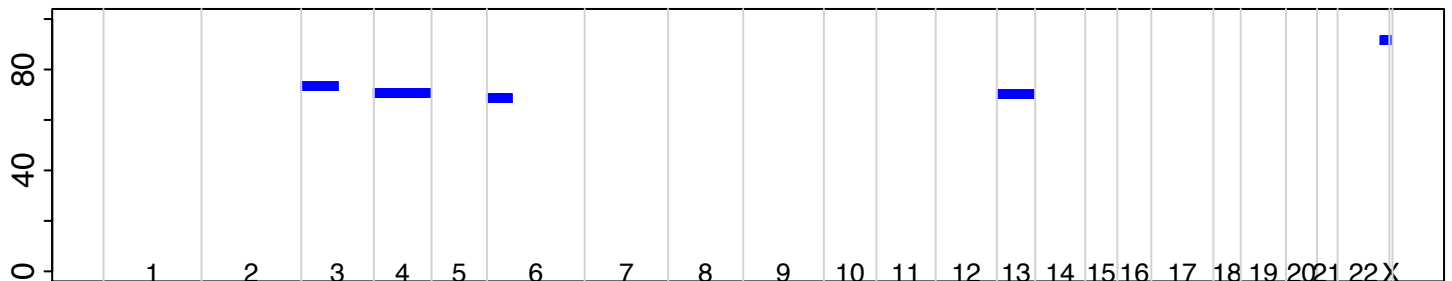

**Ploidy: 1.99, aberrant cell fraction: 20%, goodness of fit: 98.8%**

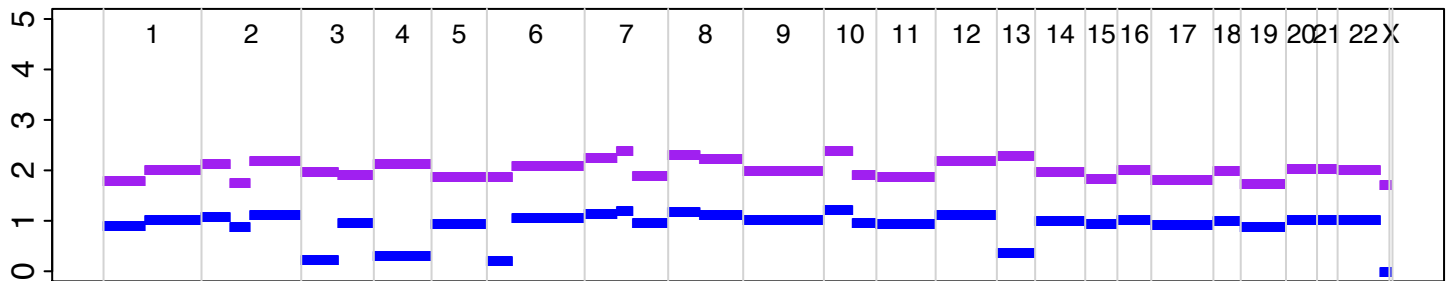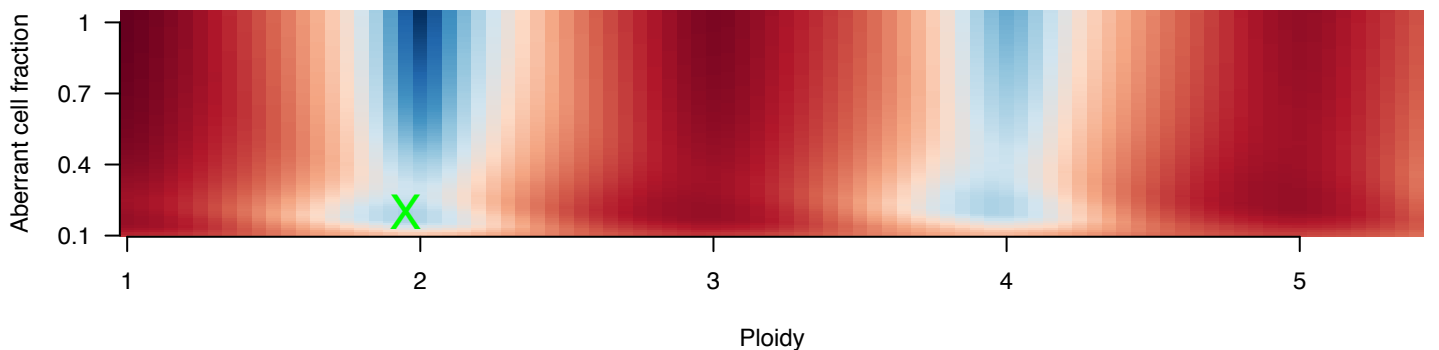

T\_T720A, LogR

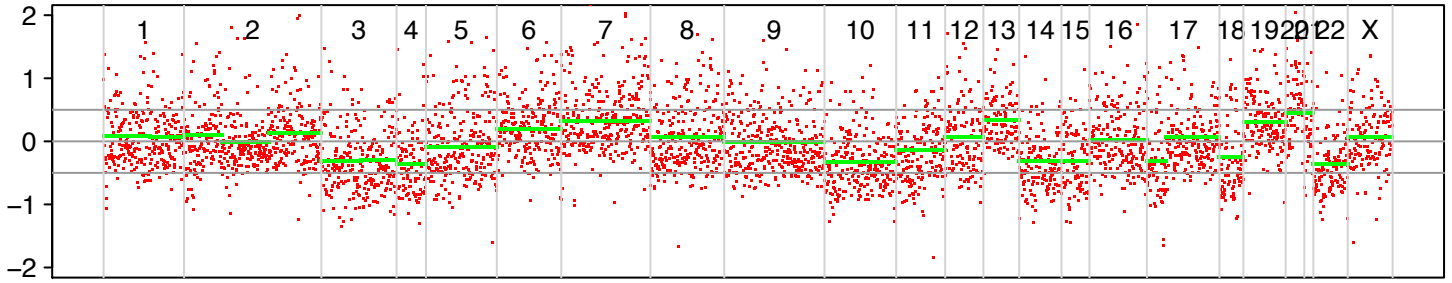

T\_T720A, BAF

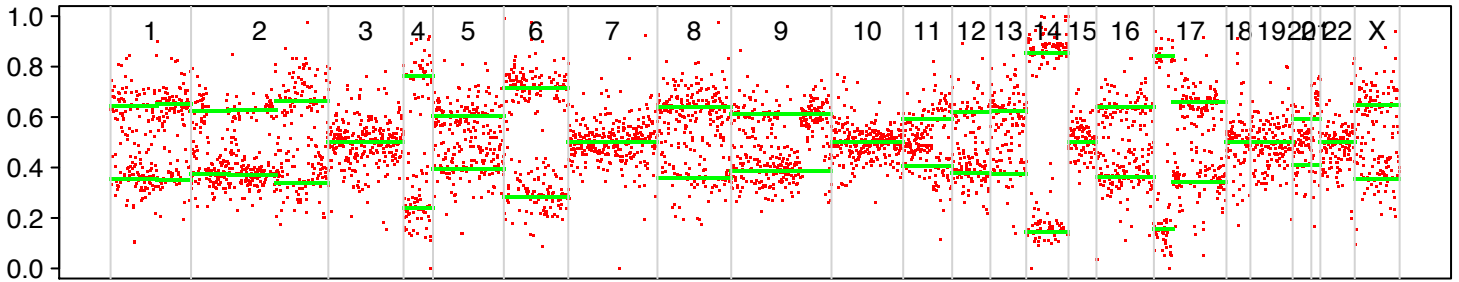

**Ploidy: 3.03, aberrant cell fraction: 67%, goodness of fit: 99.7%**

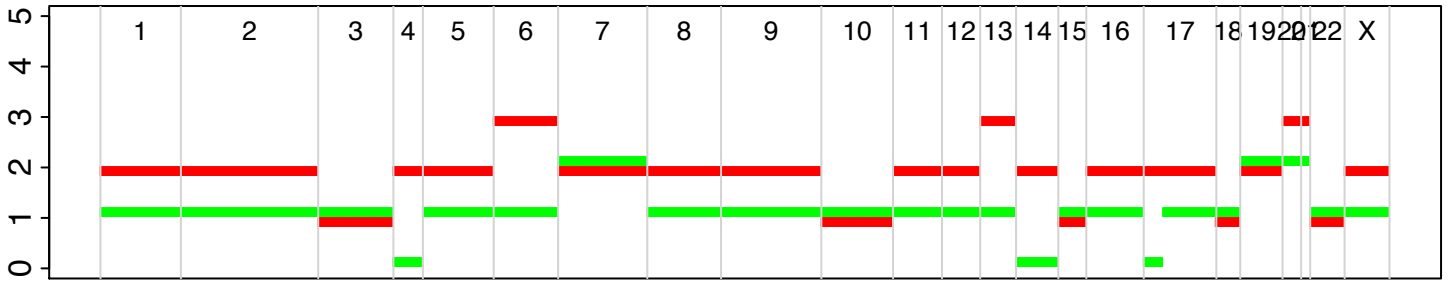

**Aberration reliability score (%), average: 81%**

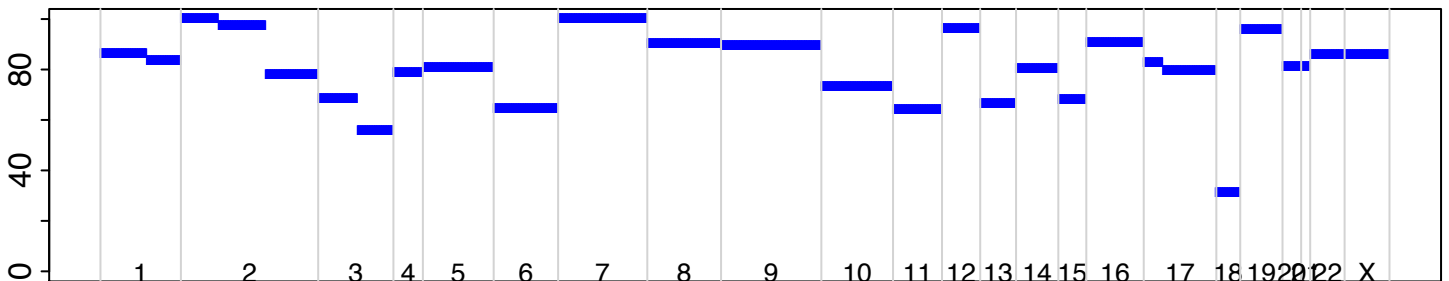

**Ploidy: 3.03, aberrant cell fraction: 67%, goodness of fit: 99.7%**

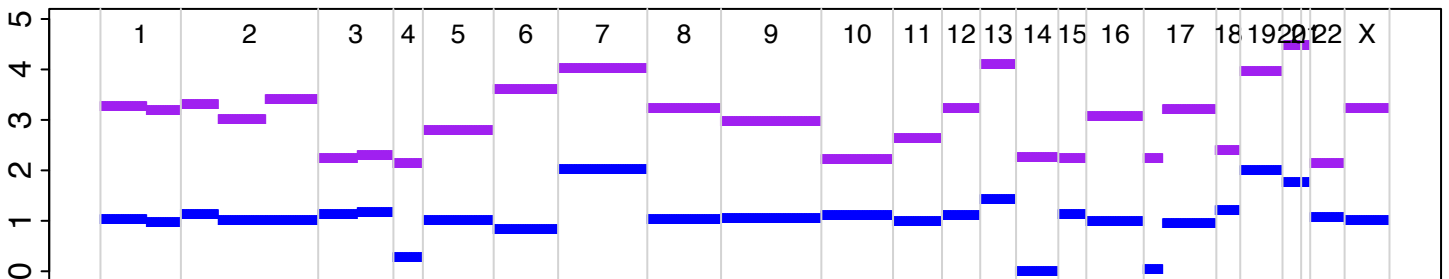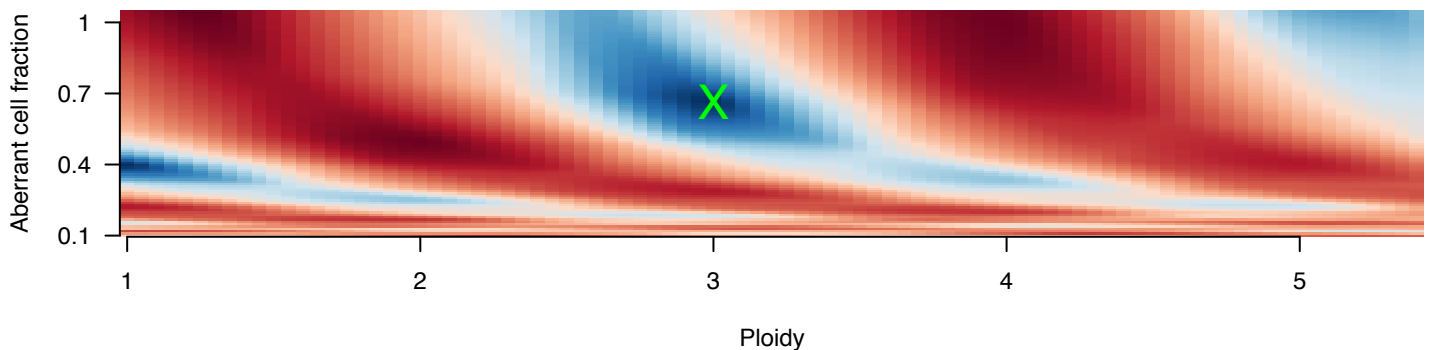



T\_T720B, LogR

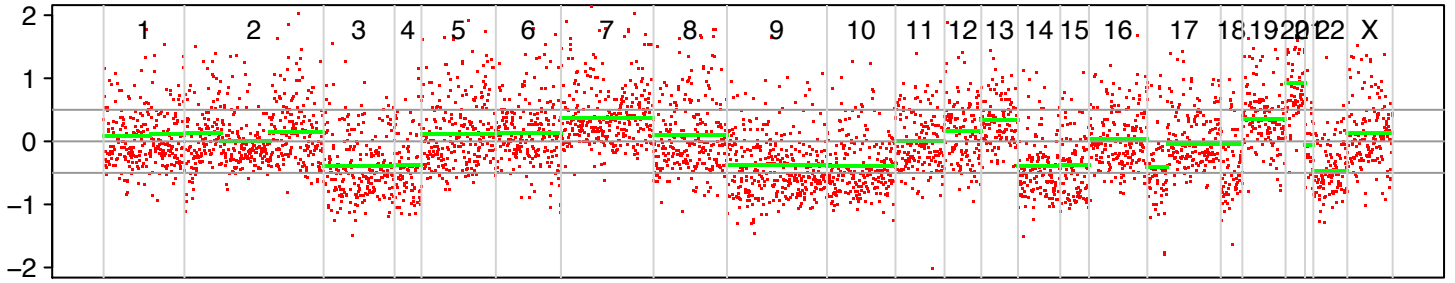

T\_T720B, BAF

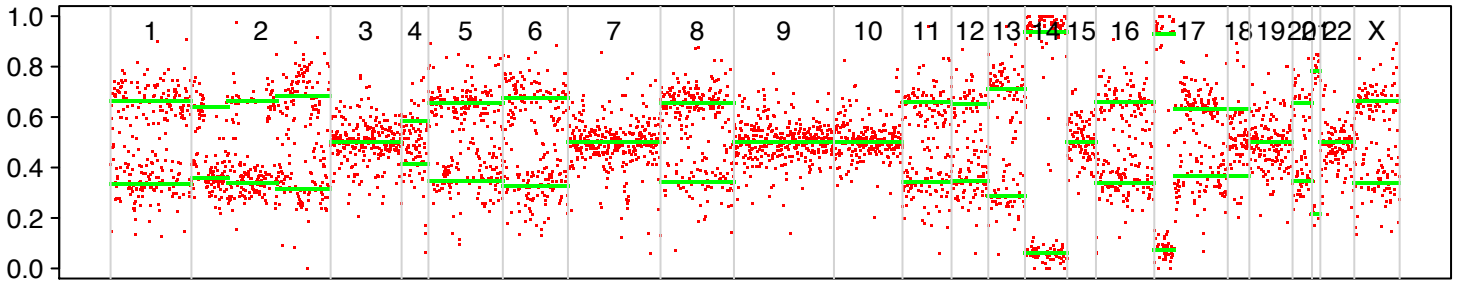

**Ploidy: 2.99, aberrant cell fraction: 85%, goodness of fit: 99.8%**

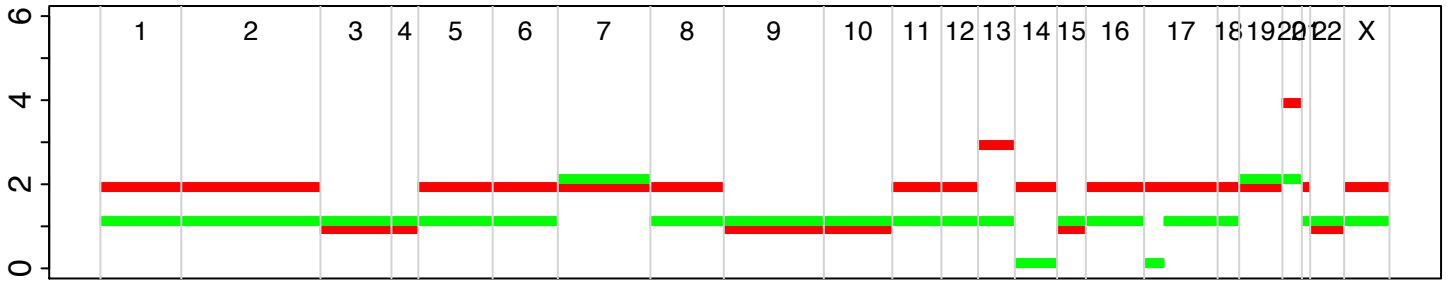

**Aberration reliability score (%), average: 87%**

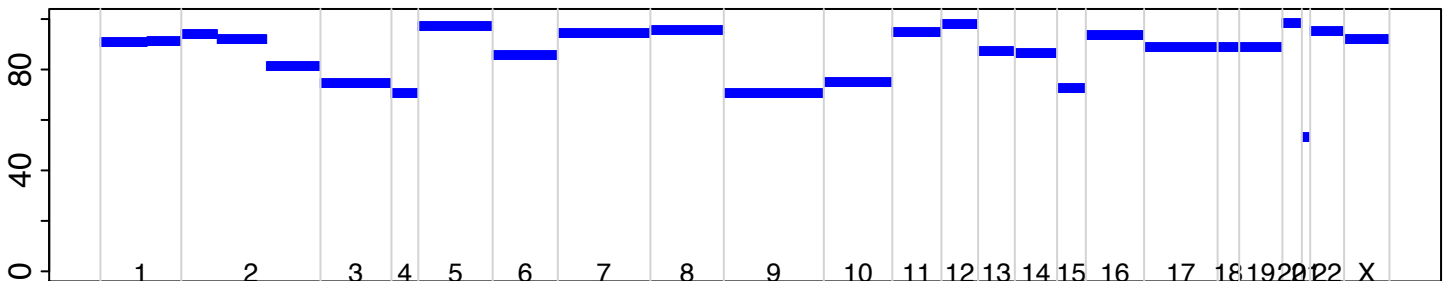

**Ploidy: 2.99, aberrant cell fraction: 85%, goodness of fit: 99.8%**

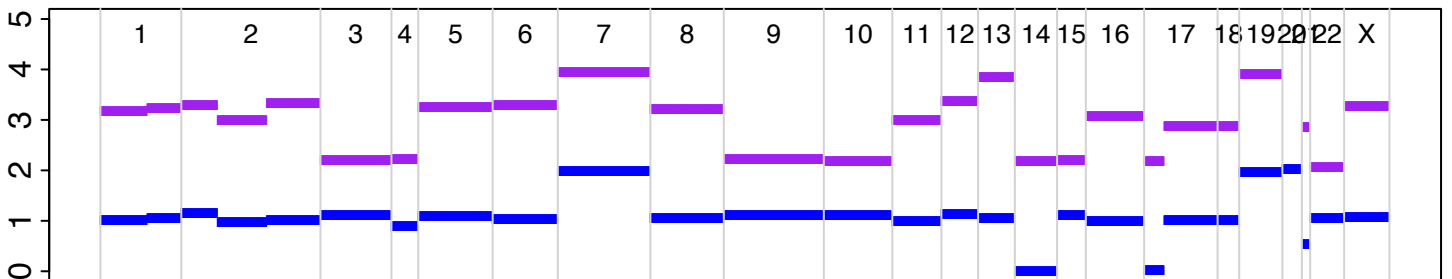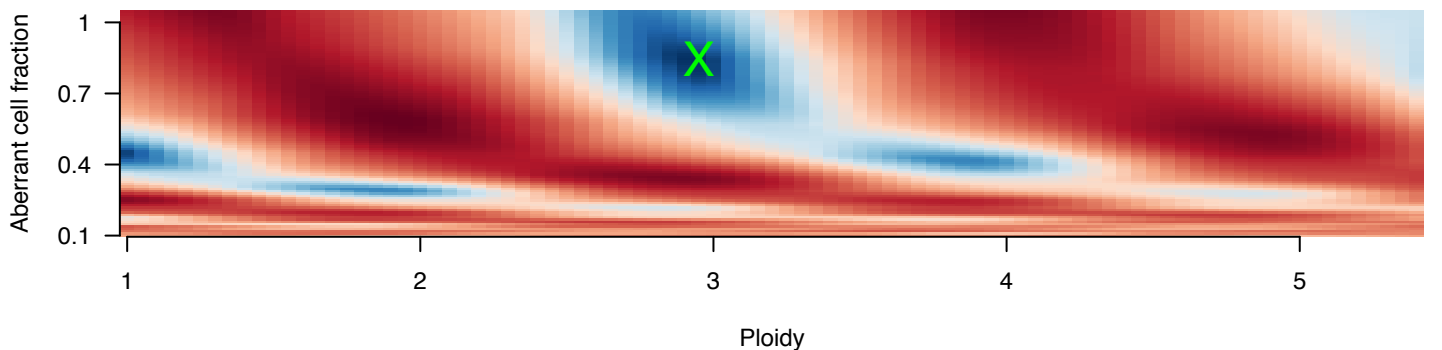

T\_T720C, LogR

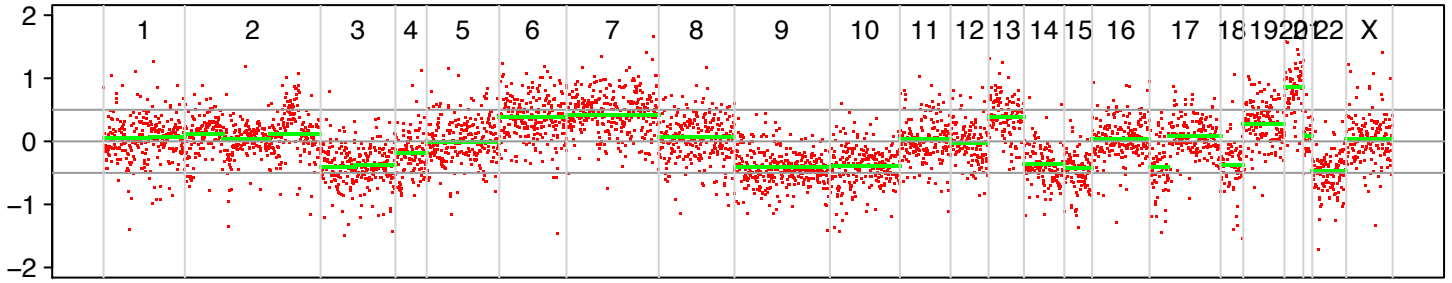

T\_T720C, BAF

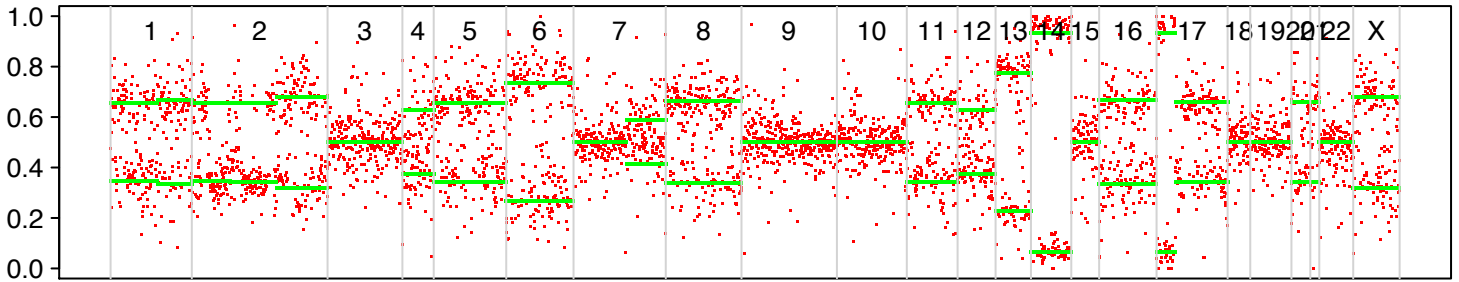

**Ploidy: 2.98, aberrant cell fraction: 86%, goodness of fit: 99.7%**

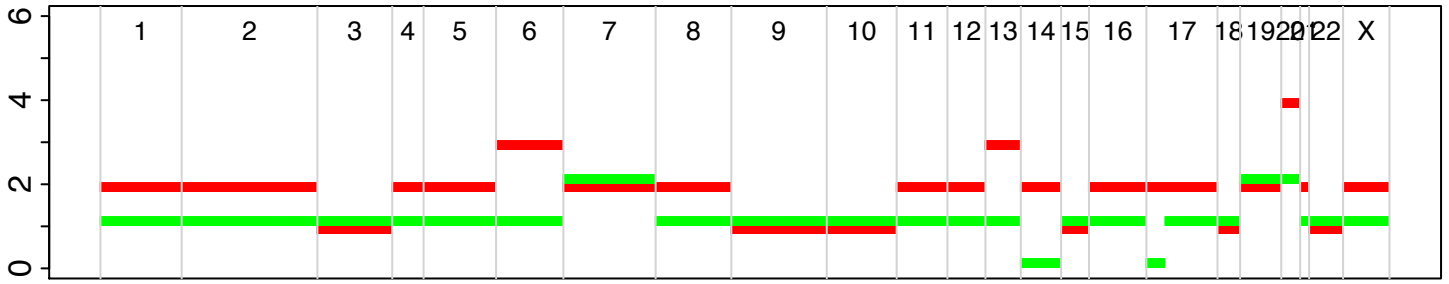

**Aberration reliability score (%), average: 87%**

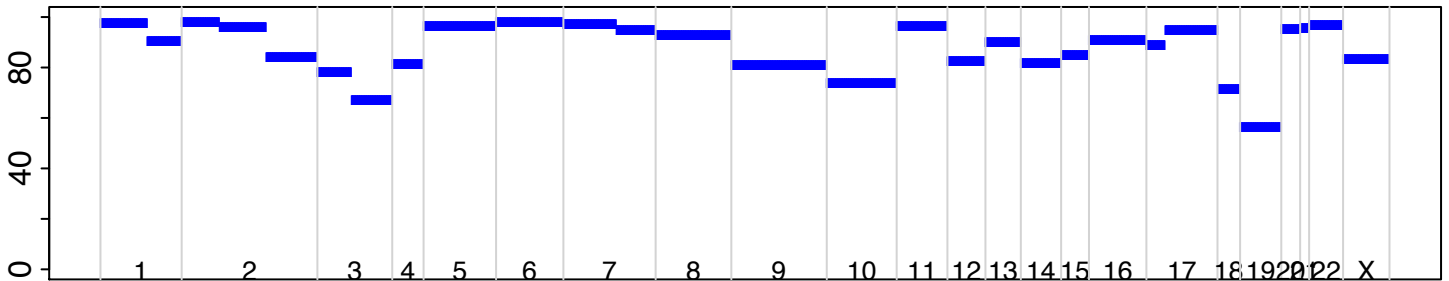

**Ploidy: 2.98, aberrant cell fraction: 86%, goodness of fit: 99.7%**

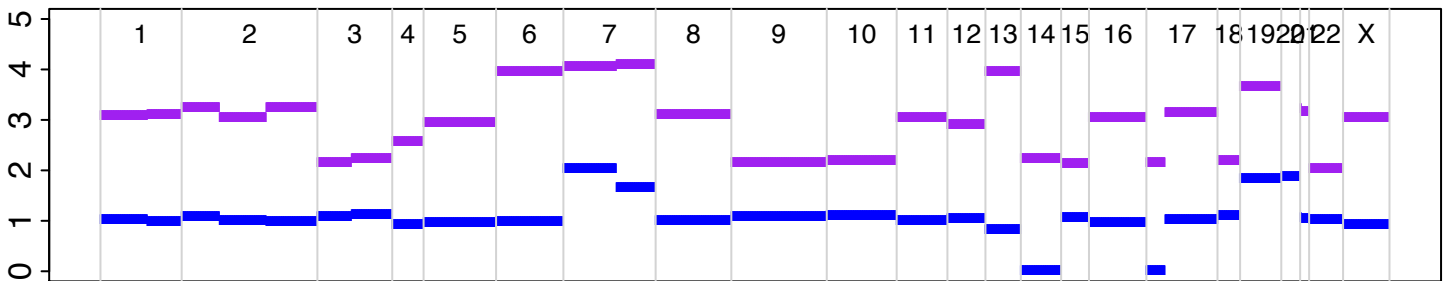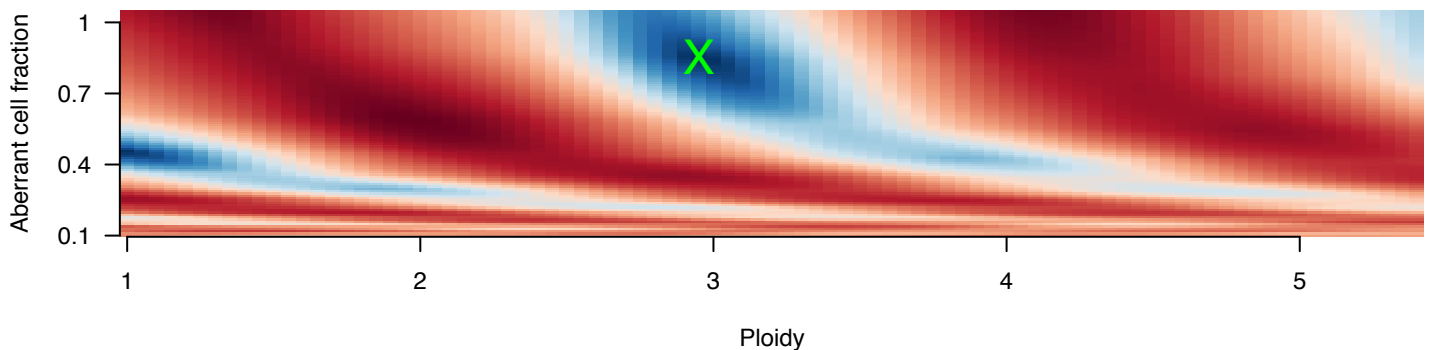

T\_T720D, LogR

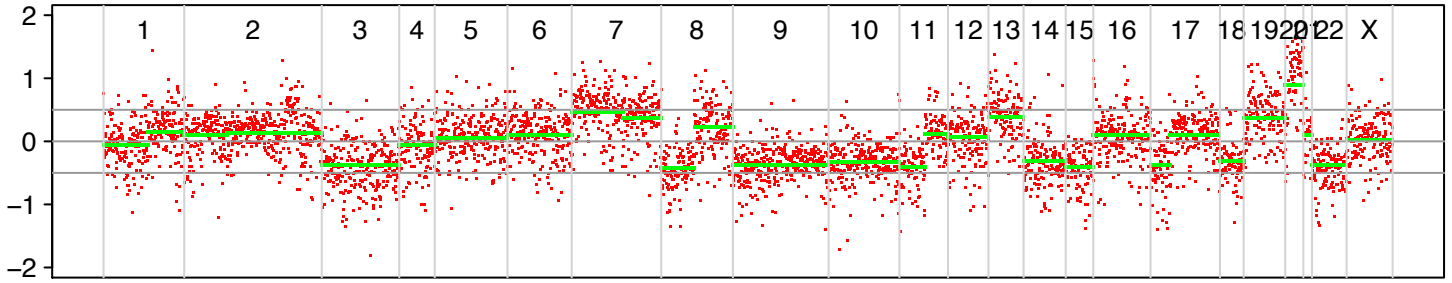

T\_T720D, BAF

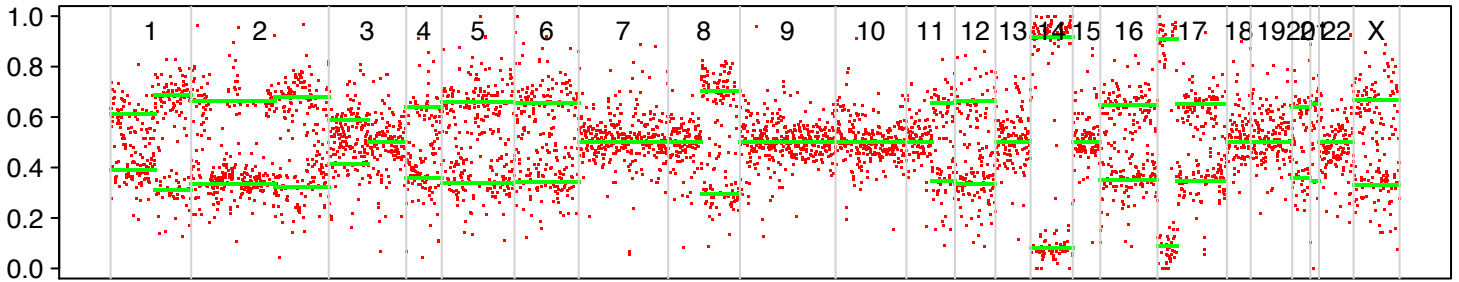

**Ploidy: 2.87, aberrant cell fraction: 82%, goodness of fit: 99.8%**

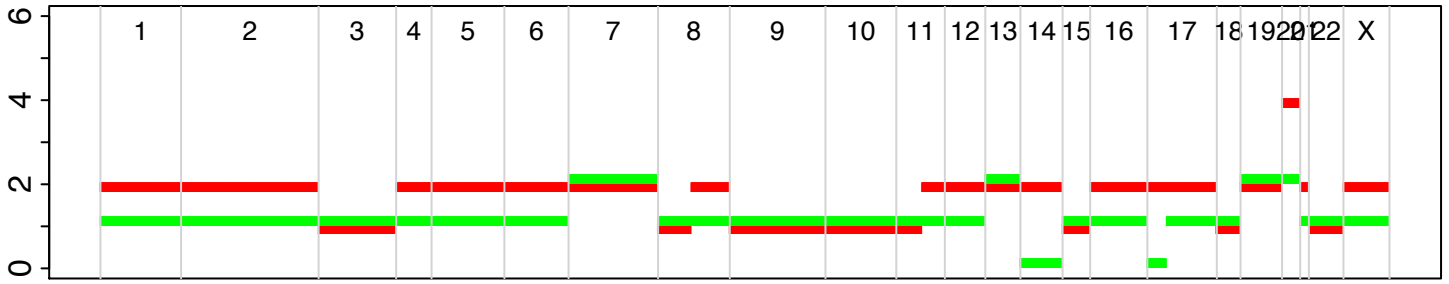

**Aberration reliability score (%), average: 86%**

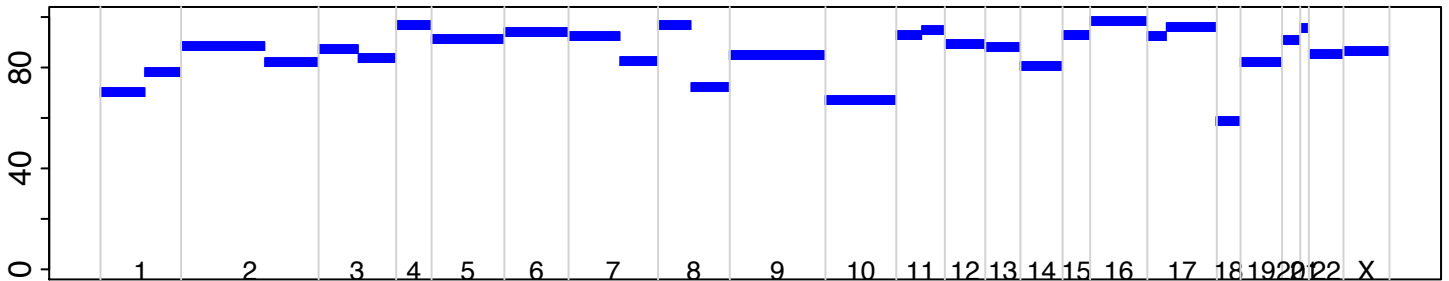

**Ploidy: 2.87, aberrant cell fraction: 82%, goodness of fit: 99.8%**

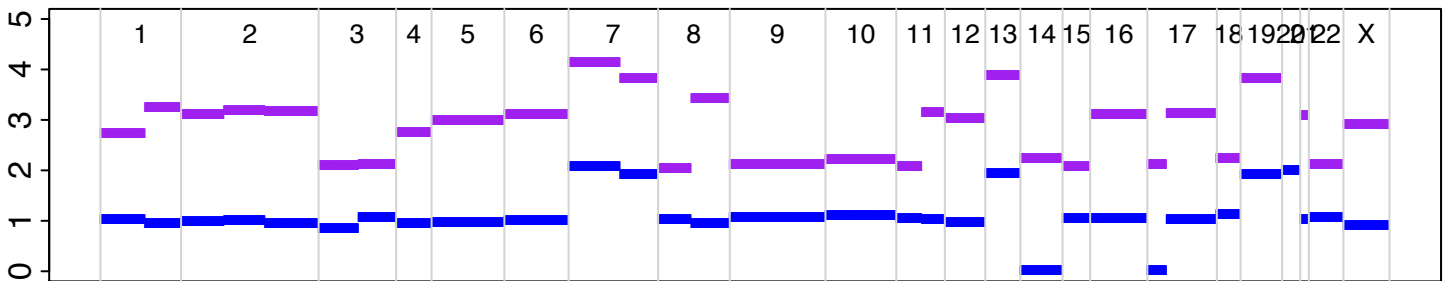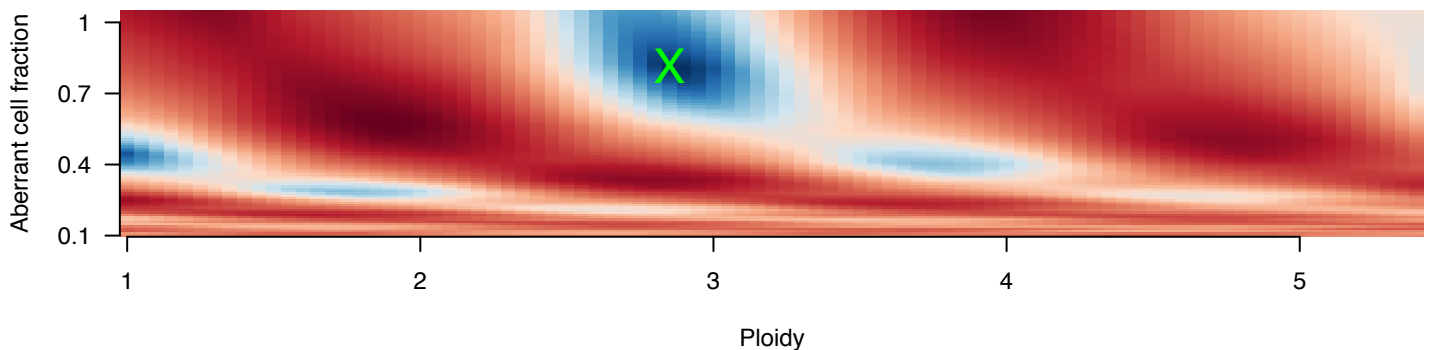

T\_T720E, LogR

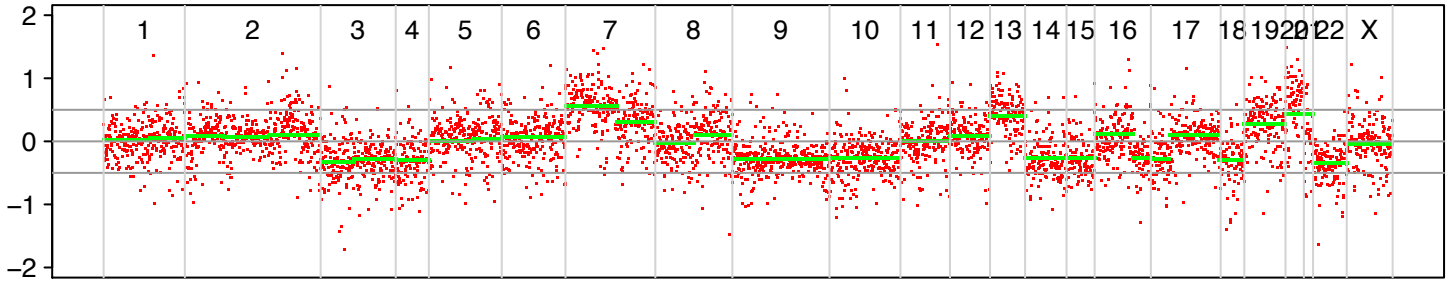

T\_T720E, BAF

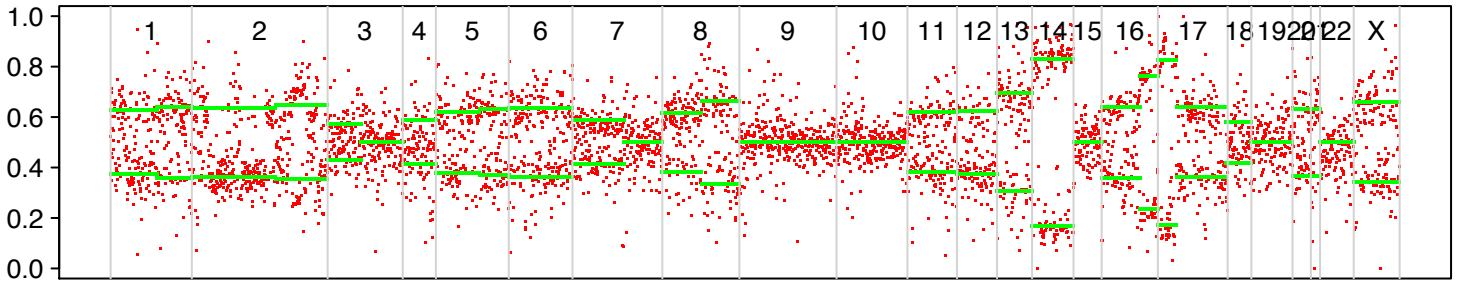

**Ploidy: 3.03, aberrant cell fraction: 62%, goodness of fit: 99.7%**

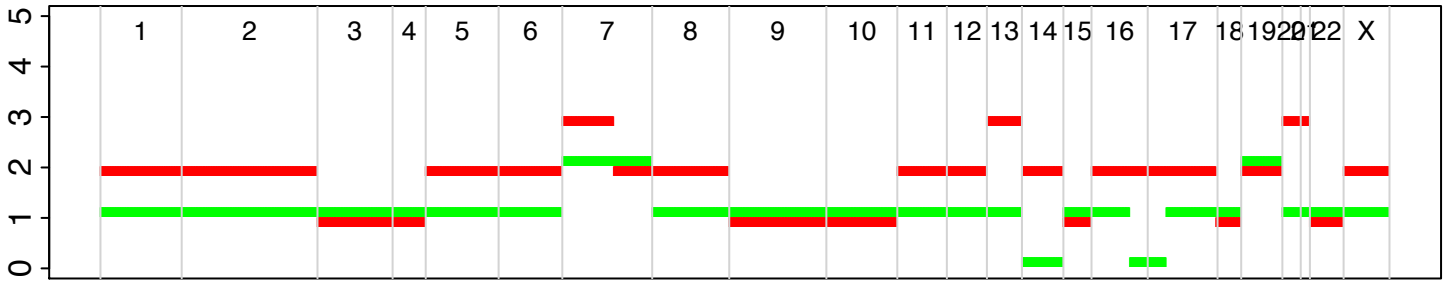

**Aberration reliability score (%), average: 80%**

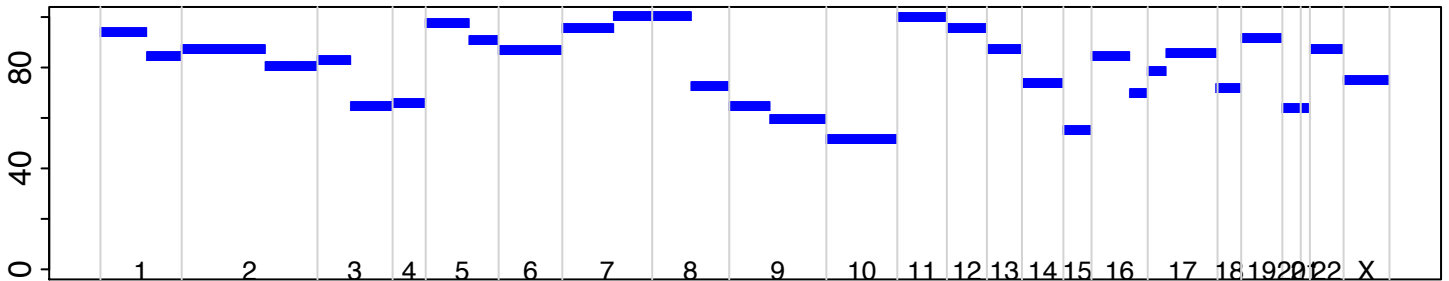

**Ploidy: 3.03, aberrant cell fraction: 62%, goodness of fit: 99.7%**

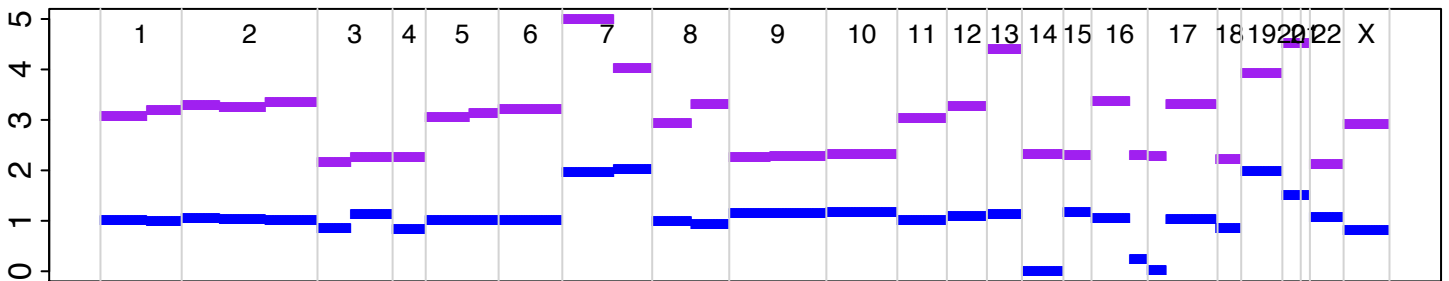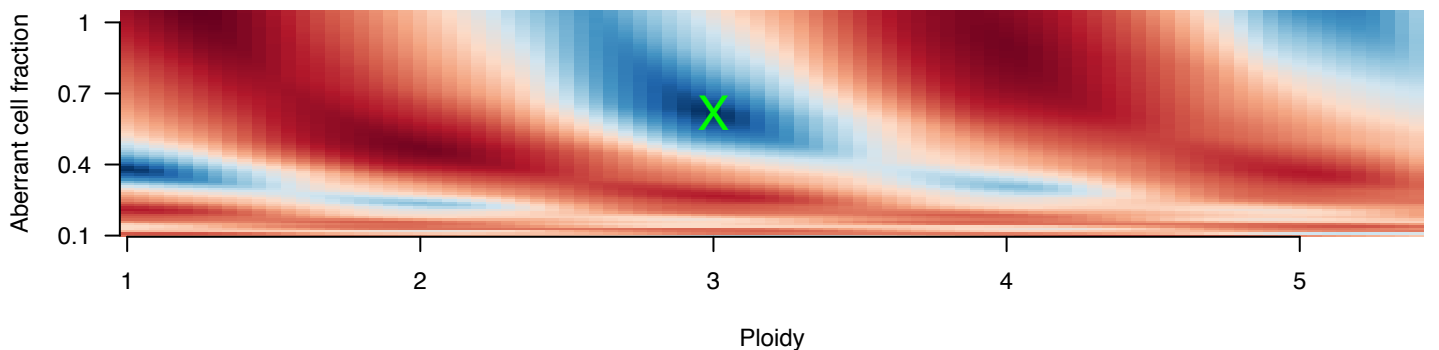

Supplement: MOL2-11-124-s002.pdf [file MOL2-11-124-s002.pdf]
