# Supplementary material for: Multiregion ultra‐deep sequencing reveals early intermixing and variable levels of intratumoral heterogeneity in colorectal cancer
Source: PubMed Central journal article supplement (PMC5527459; doi:10.1002/1878-0261.12012), 2016-10-20
Supplement: MOL2-11-124-s001.pdf [file MOL2-11-124-s001.pdf]

Patient 1

Patient 2

|        | A     | B     | C     | D     | E     |
|--------|-------|-------|-------|-------|-------|
| TP53   | 0.506 | 0.175 | 0.659 | 0.014 | 0.631 |
| FAT4   | 0.452 | 0.135 | 0.628 | 0.013 | 0.606 |
| RAD50  | 0.420 | 0.174 | 0.500 | 0.016 | 0.510 |
| SMG1   | 0.318 | 0.143 | 0.472 | 0.015 | 0.416 |
| ZAP70  | 0.308 | 0.167 | 0.407 | 0.014 | 0.373 |
| ERCC6  | 0.333 | 0.130 | 0.381 | 0.012 | 0.384 |
| XIRP2  | 0.318 | 0.140 | 0.379 | 0.011 | 0.378 |
| DNMT3A | 0.307 | 0.139 | 0.367 | 0.014 | 0.386 |
| BRAF   | 0.285 | 0.107 | 0.393 | 0.014 | 0.286 |
| SDK1   | 0.182 | 0.076 | 0.386 | 0.006 | 0.334 |
| AATK   | 0.264 | 0.122 | 0.220 | 0.011 | 0.236 |
| CDH11  | 0.207 | 0.133 | 0.430 |       | 0.414 |
| EPHA7  | 0.002 | 0.065 | 0.198 |       | 0.114 |

|          | A     | B     | C     | D     | E     |
|----------|-------|-------|-------|-------|-------|
| JAK3     | 0.221 | 0.365 | 0.041 | 0.123 | 0.406 |
| GLI2     | 0.195 | 0.337 | 0.087 | 0.198 | 0.326 |
| CRTC1    | 0.207 | 0.317 | 0.066 | 0.158 | 0.385 |
| CYB5D2   | 0.206 | 0.330 | 0.036 | 0.121 | 0.398 |
| KRAS     | 0.200 | 0.319 | 0.033 | 0.126 | 0.387 |
| EP300    | 0.205 | 0.358 | 0.023 | 0.089 | 0.382 |
| APC      | 0.187 | 0.327 | 0.019 | 0.105 | 0.402 |
| MYH11    | 0.194 | 0.325 | 0.021 | 0.092 | 0.398 |
| RB1      | 0.184 | 0.322 | 0.035 | 0.083 | 0.401 |
| APC      | 0.189 | 0.316 | 0.027 | 0.098 | 0.384 |
| KAT6A    | 0.178 | 0.329 | 0.025 | 0.088 | 0.389 |
| GUCY1A2  | 0.177 | 0.322 | 0.024 | 0.097 | 0.382 |
| RAF1     | 0.185 | 0.328 | 0.006 | 0.084 | 0.399 |
| DCLK1    | 0.170 | 0.310 | 0.022 | 0.080 | 0.353 |
| ACVR1B   | 0.207 | 0.268 | 0.031 | 0.106 | 0.287 |
| SDK1     | 0.162 | 0.267 | 0.022 | 0.086 | 0.305 |
| SOX11    | 0.119 | 0.270 | 0.025 | 0.112 | 0.255 |
| DNMT3A   | 0.029 | 0.010 | 0.043 | 0.034 | 0.005 |
| ERCC4    | 0.019 | 0.001 | 0.004 | 0.077 | 0.001 |
| CSDM3    |       | 0.185 |       | 0.008 | 0.372 |
| EPHA3    |       | 0.196 |       | 0.008 | 0.387 |
| TNFRSF14 | 0.016 | 0.005 | 0.018 | 0.023 |       |
| CIT      |       | 0.179 |       |       | 0.303 |
| FBXW7    | 0.212 | 0.345 |       |       | 0.403 |
| ADAMTSL3 | 0.023 |       | 0.012 |       |       |
| ROBO2    |       | 0.116 |       |       |       |
| CTTN     | 0.089 |       |       |       |       |
| DCC      | 0.025 |       |       |       |       |
| MAP7     |       | 0.024 |       |       |       |
| PREX2    |       | 0.024 |       |       |       |

Patient 3

Patient 4

|        | A     | B     | C     | D     | E     |
|--------|-------|-------|-------|-------|-------|
| AMER1  | 0.327 | 0.036 | 0.093 | 0.688 | 0.070 |
| POLE   | 0.171 | 0.039 | 0.131 | 0.363 | 0.074 |
| KRAS   | 0.163 | 0.042 | 0.124 | 0.321 | 0.055 |
| BRAF   | 0.170 | 0.029 | 0.061 | 0.355 | 0.035 |
| ACVR2A | 0.163 | 0.021 | 0.058 | 0.354 | 0.040 |
| ERBB2  | 0.173 | 0.026 | 0.064 | 0.332 | 0.034 |
| DNAH1  | 0.178 | 0.026 | 0.064 | 0.322 | 0.037 |
| TP53   | 0.165 | 0.029 | 0.056 | 0.331 | 0.038 |
| RNF43  | 0.158 | 0.018 | 0.073 | 0.333 | 0.033 |
| APC    | 0.161 | 0.019 | 0.050 | 0.352 | 0.029 |
| APC    | 0.153 | 0.020 | 0.047 | 0.338 | 0.032 |
| NOTCH1 | 0.151 | 0.018 | 0.072 | 0.260 | 0.028 |
| GATA3  | 0.052 |       |       | 0.063 |       |
| STK11  | 0.144 |       | 0.001 | 0.266 |       |
| MAP3K1 | 0.160 |       |       | 0.317 |       |
| SMAD2  | 0.161 |       |       | 0.321 |       |
| SPECC1 | 0.161 |       |       | 0.308 |       |
| ERBB4  | 0.164 |       |       | 0.297 |       |
| PREX2  |       |       | 0.056 | 0.050 | 0.061 |
| FAT1   |       | 0.015 |       | 0.048 | 0.040 |
| TGFBR1 |       | 0.015 | 0.048 | 0.036 | 0.026 |
| MED12  | 0.064 |       |       |       |       |
| MED12  |       |       |       |       | 0.054 |
| PDGFRA |       |       |       | 0.047 |       |
| LRIG3  |       |       | 0.045 |       |       |
| BRCA1  |       |       | 0.044 |       |       |
| XIRP2  |       |       | 0.040 |       |       |
| TESK1  |       |       |       | 0.040 |       |
| CRTC1  |       |       |       |       | 0.038 |
| ALK    | 0.036 |       |       |       |       |
| ERCC6  | 0.035 |       |       |       |       |
| NEK8   |       |       |       |       | 0.028 |
| ARID1B | 0.028 |       |       |       |       |
| KDM5B  |       |       |       | 0.026 |       |
| DCLK1  |       |       |       |       | 0.023 |
| SMG1   |       |       |       |       | 0.022 |

|        | A       | B     | C        | D     | E       |
|--------|---------|-------|----------|-------|---------|
| TP53   | 0.689   | 0.872 | 0.878    | 0.842 | 0.678   |
| SFPQ   | 0.634   | 0.660 | 0.702    | 0.622 | 0.629   |
| TIAM1  | 0.531   | 0.705 | 0.613    | 0.593 | 0.503   |
| SOX9   | 0.540   | 0.592 | 0.583    | 0.562 | 0.488   |
| APC    | 0.464   | 0.603 | 0.596    | 0.584 | 0.501   |
| GRM8   | 0.356   | 0.370 | 0.386    | 0.370 | 0.313   |
| FAT4   | 0.301   | 0.376 | 0.302    | 0.322 | 0.318   |
| WHSC1  | 0.091   | 0.401 | 0.366    | 0.299 | 0.327   |
| TRIO   | 0.298   | 0.302 | 0.311    | 0.302 | 0.264   |
| KRAS   | 0.262   | 0.294 | 0.346    | 0.308 | 0.260   |
| APC    | 0.267   | 0.301 | 0.302    | 0.299 | 0.245   |
| ELL    | 0.200   | 0.235 | 0.236    | 0.232 | 0.217   |
| GRM8   | 0.054   | 0.217 | 0.255    | 0.003 | 0.002   |
| LAMA1  | 0.00042 | 0.016 | 0.000070 |       | 0.00021 |
| TGFBR2 | 0.070   | 0.015 |          |       | 0.006   |
| TIAM1  | 0.071   | 0.171 | 0.286    |       | 0.202   |
| SRGAP3 | 0.092   | 0.001 |          |       |         |
| STL    |         | 0.365 | 0.478    |       |         |
| SMAD3  |         | 0.195 |          |       |         |
| AKAP9  |         | 0.132 |          |       |         |
| BRSK1  |         |       |          |       | 0.109   |
| MYO3B  |         |       | 0.098    |       |         |
| JAK3   |         | 0.096 |          |       |         |
| SMAD4  | 0.048   |       |          |       |         |
| EDNRB  | 0.024   |       |          |       |         |
