# Supplementary material for: Multiregion ultra‐deep sequencing reveals early intermixing and variable levels of intratumoral heterogeneity in colorectal cancer
Source: PubMed Central journal article supplement (PMC5527459; doi:10.1002/1878-0261.12012), 2016-10-20

ITGB4 P = 0 P.adj = 0.001

Fig.S3

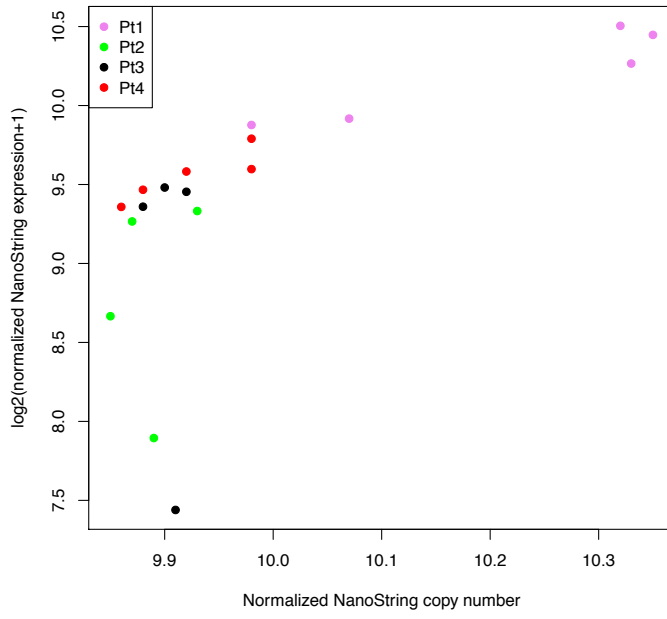

GRB2 P = 0.001 P.adj = 0.008

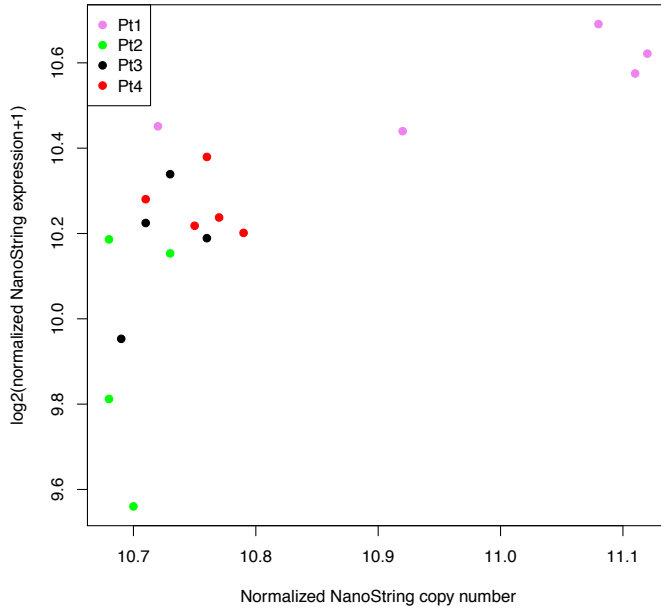

VEGFA P = 0.001 P.adj = 0.011

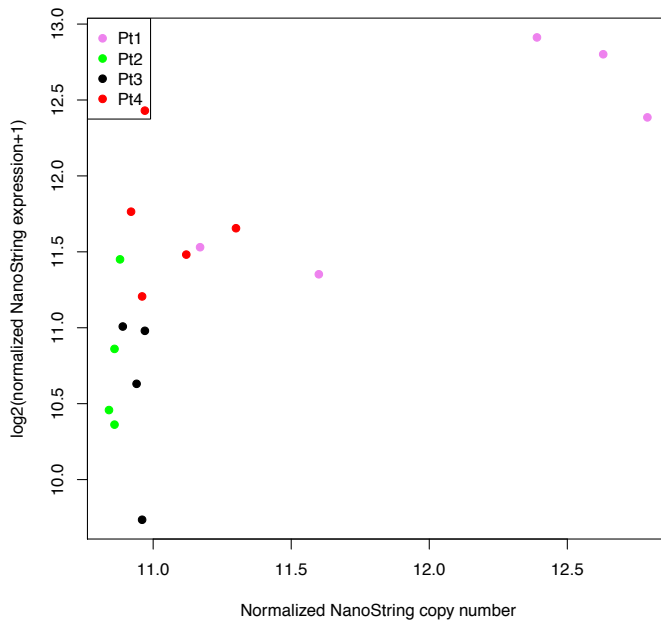

Supplement: MOL2-11-124-s003.pdf [file MOL2-11-124-s003.pdf]
