# Supplementary material for: Multiregion ultra‐deep sequencing reveals early intermixing and variable levels of intratumoral heterogeneity in colorectal cancer
Source: PubMed Central journal article supplement (PMC5527459; doi:10.1002/1878-0261.12012), 2016-10-20

**AKT2 P = 0 P.adj = 0.003**

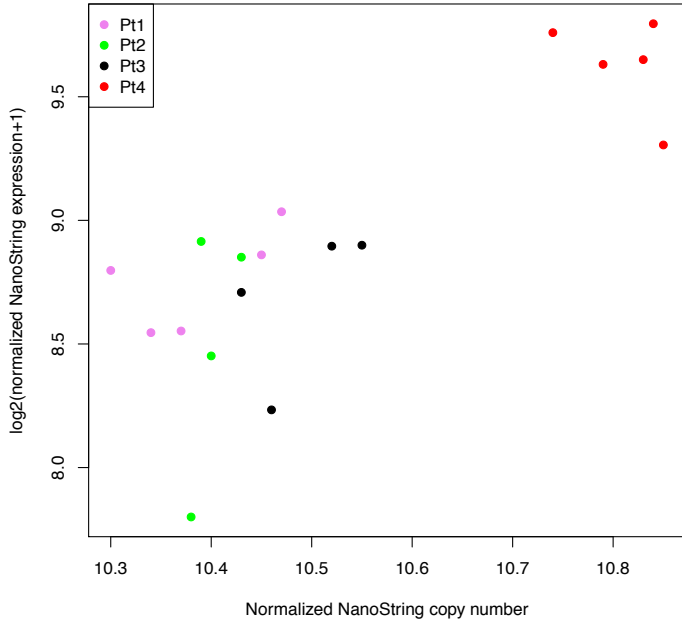

**BCL2L1 P = 0.002 P.adj = 0.014**

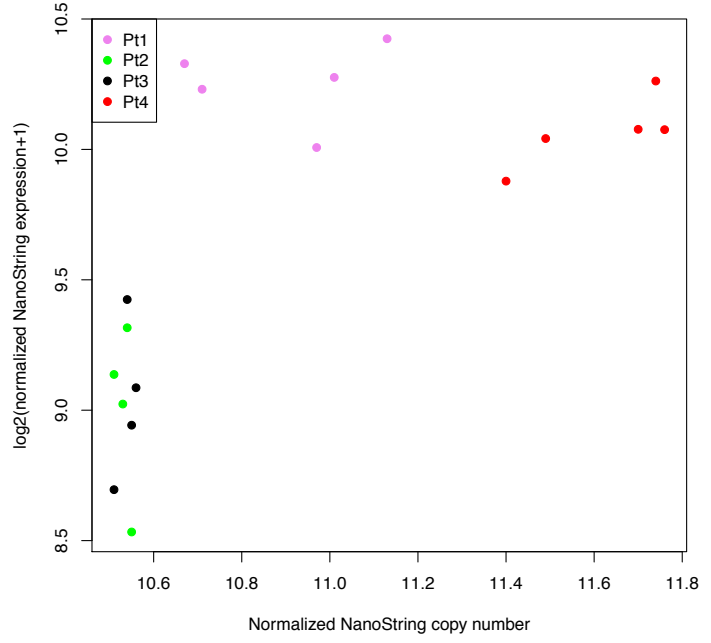

**PIK3CA P = 0.016 P.adj = 0.075**

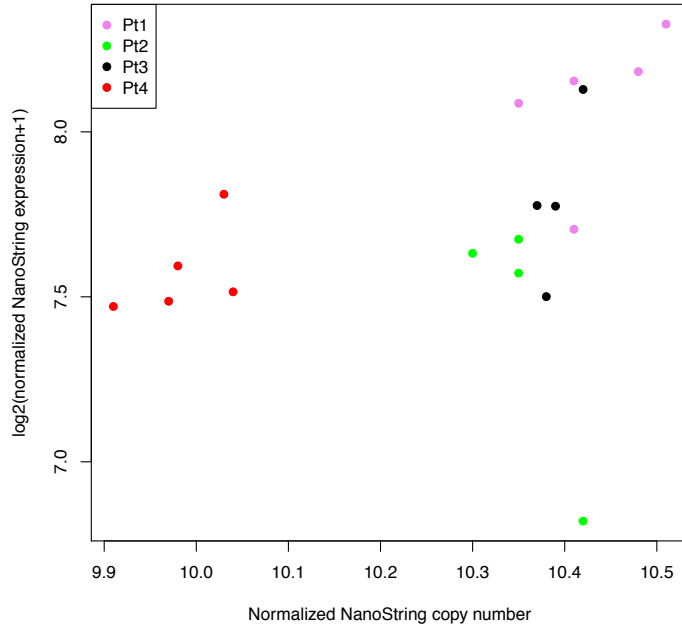

**PTEN P = 0.006 P.adj = 0.036**

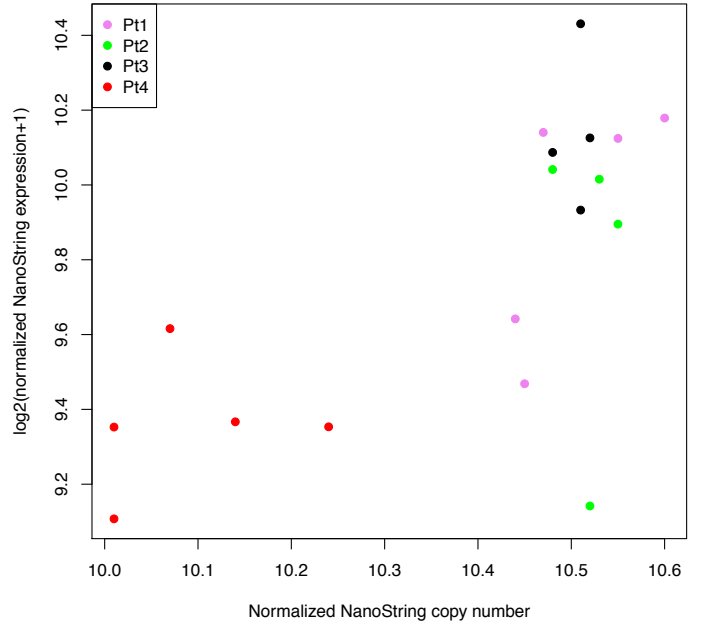

Supplement: MOL2-11-124-s004.pdf [file MOL2-11-124-s004.pdf]
